# Supplementary material for: Polytopal Rearrangement Governing Stereochemistry of Bicyclic Oxime Ether Synthesis
Source: MDPI journal article supplement (doi:10.3390/ijms232012331), 2022-10-15
Supplement: s1 [file s1]

# Supplementary Materials

## Contents

### Supplementary Figures

|                                                                      |    |
|----------------------------------------------------------------------|----|
| Figures S1-S12: NMR spectra ( $^1\text{H}$ , $^{13}\text{C}$ ) ..... | 1  |
| Figures S13-S16: IR spectra .....                                    | 13 |
| Figures S17-S20: HRMS spectra .....                                  | 17 |
| Cartesian coordinates of conformers .....                            | 19 |

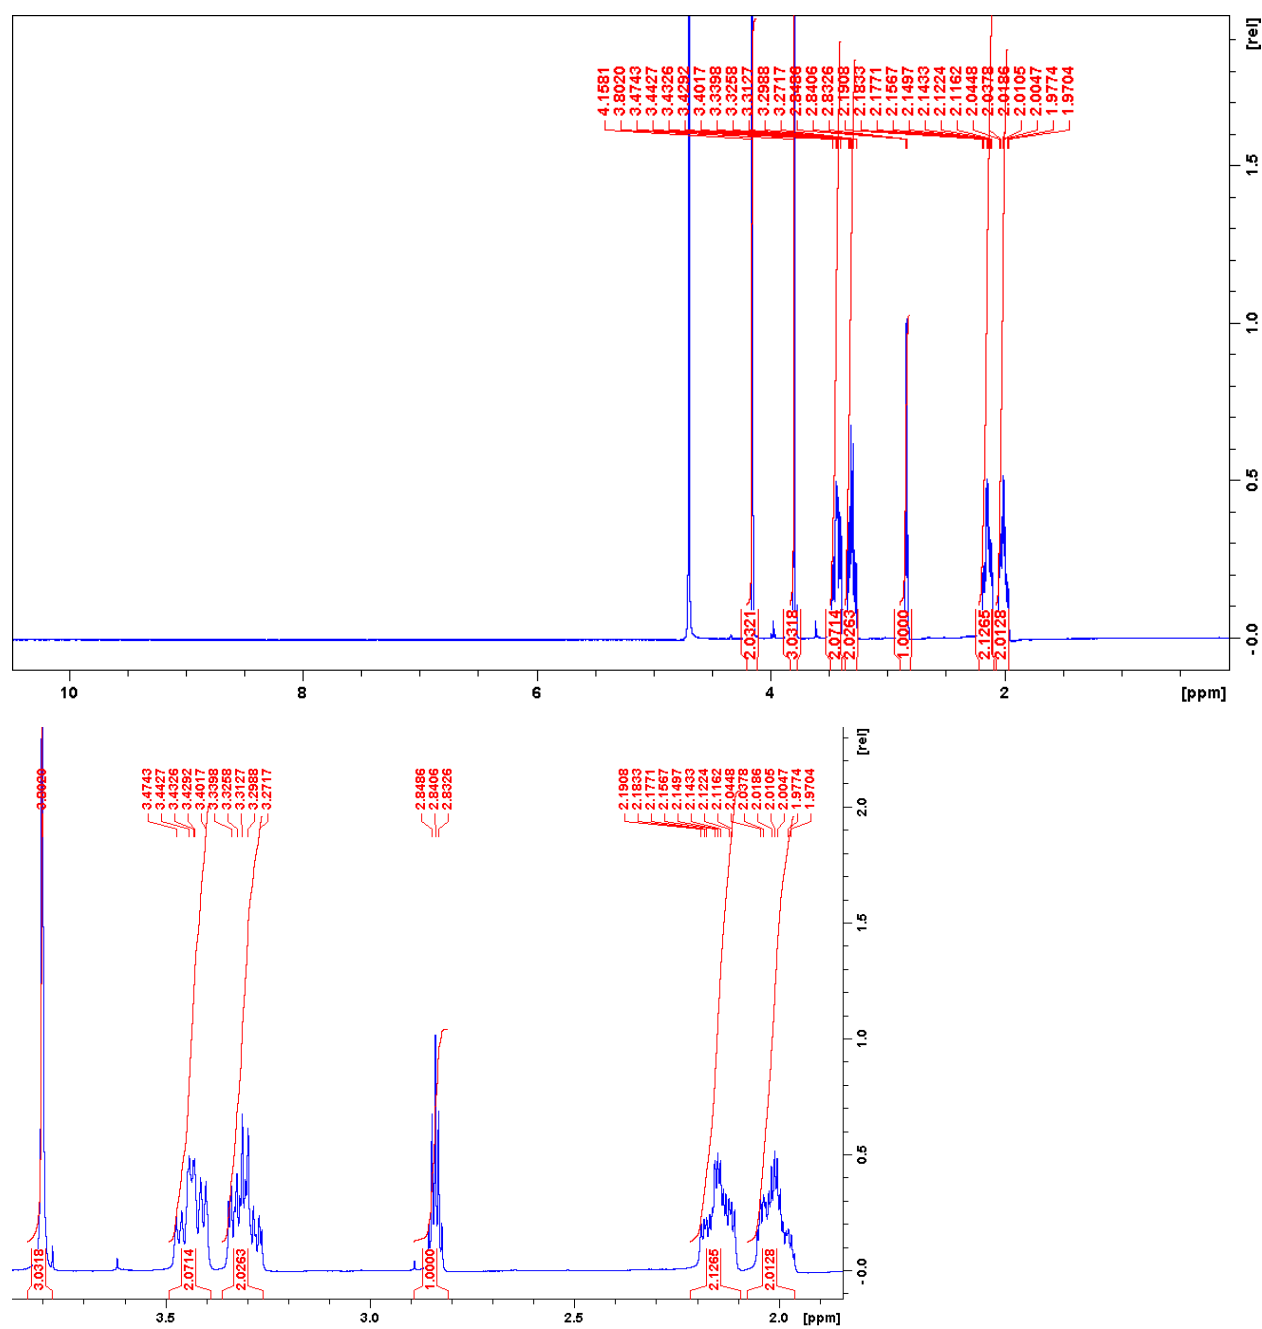

Figure S1.  $^1\text{H}$  NMR spectrum of (E)-1.

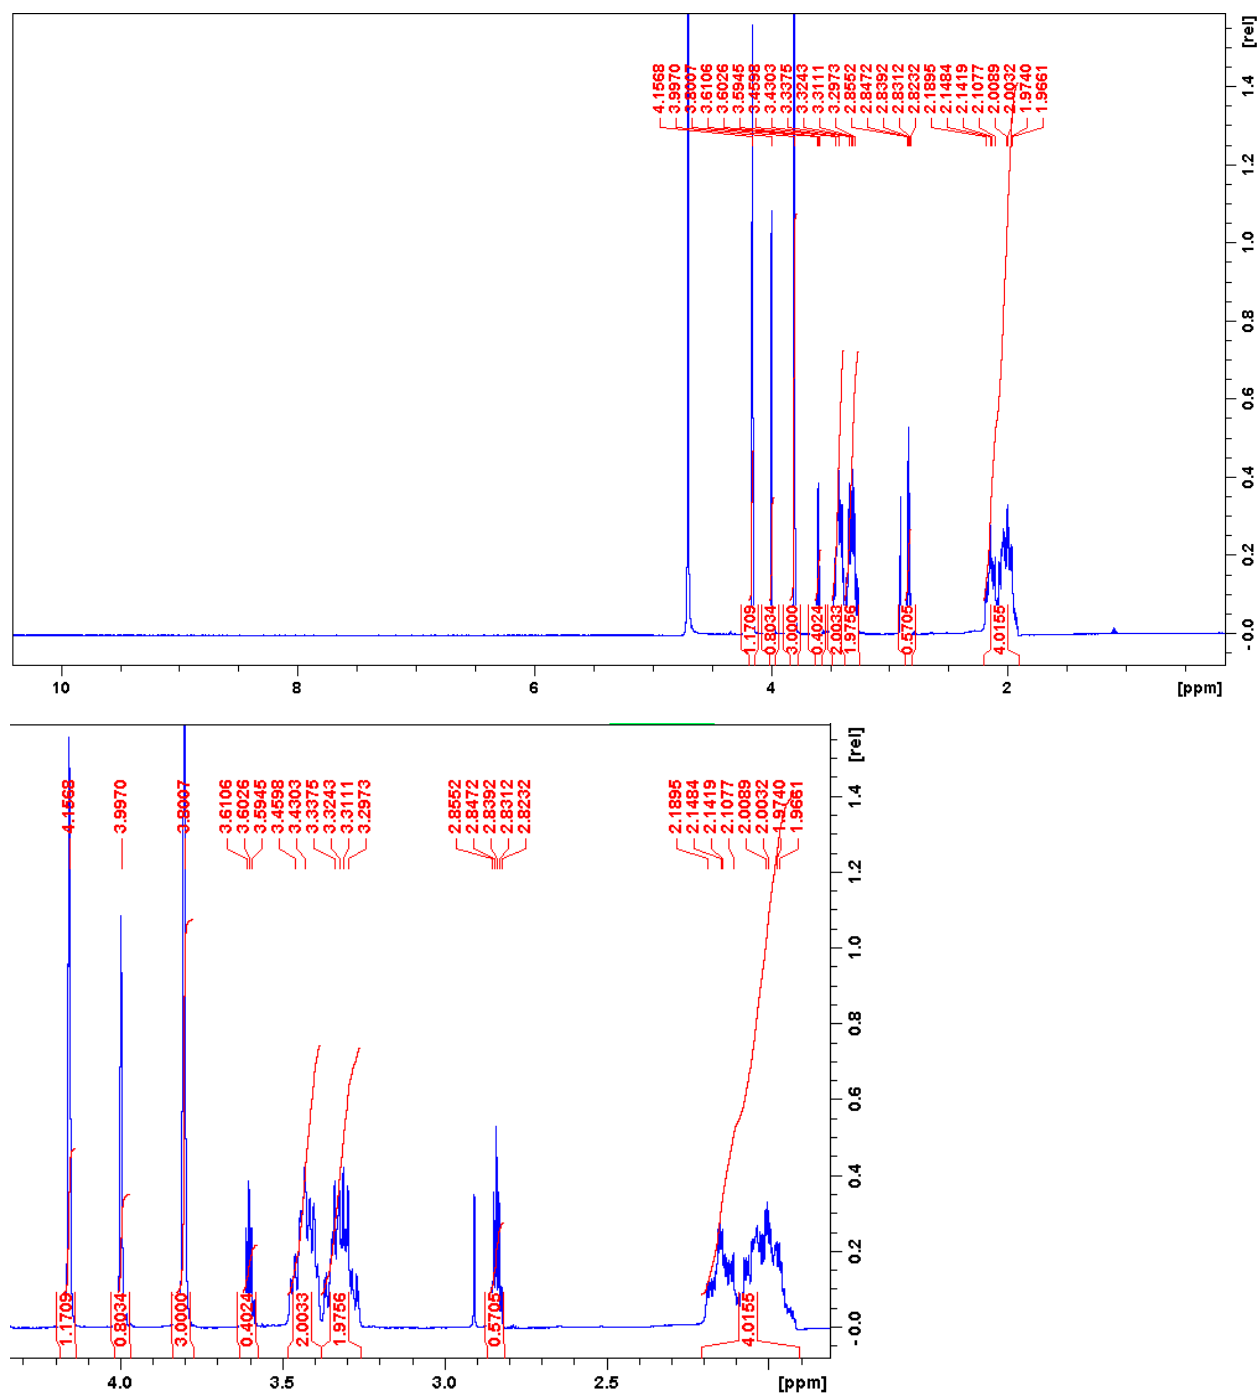

Figure S2.  $^1\text{H}$  NMR spectrum of (E)- and (Z)-1.

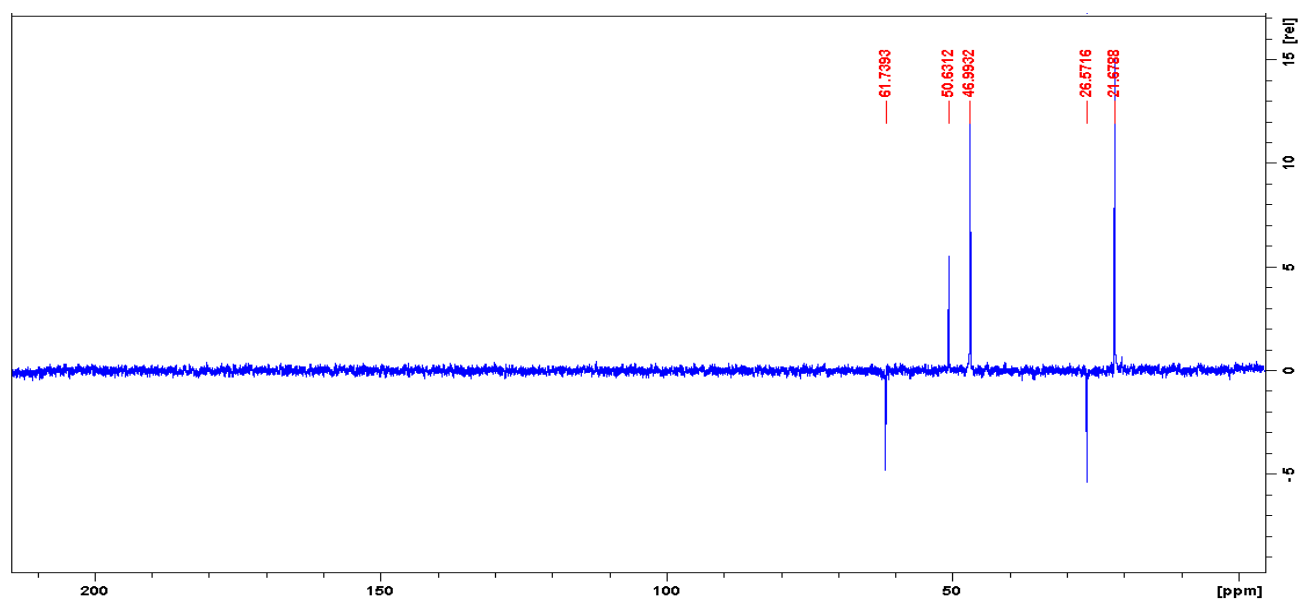

**Figure S3.**  $^{13}\text{C}$  NMR spectrum of (E)-1.

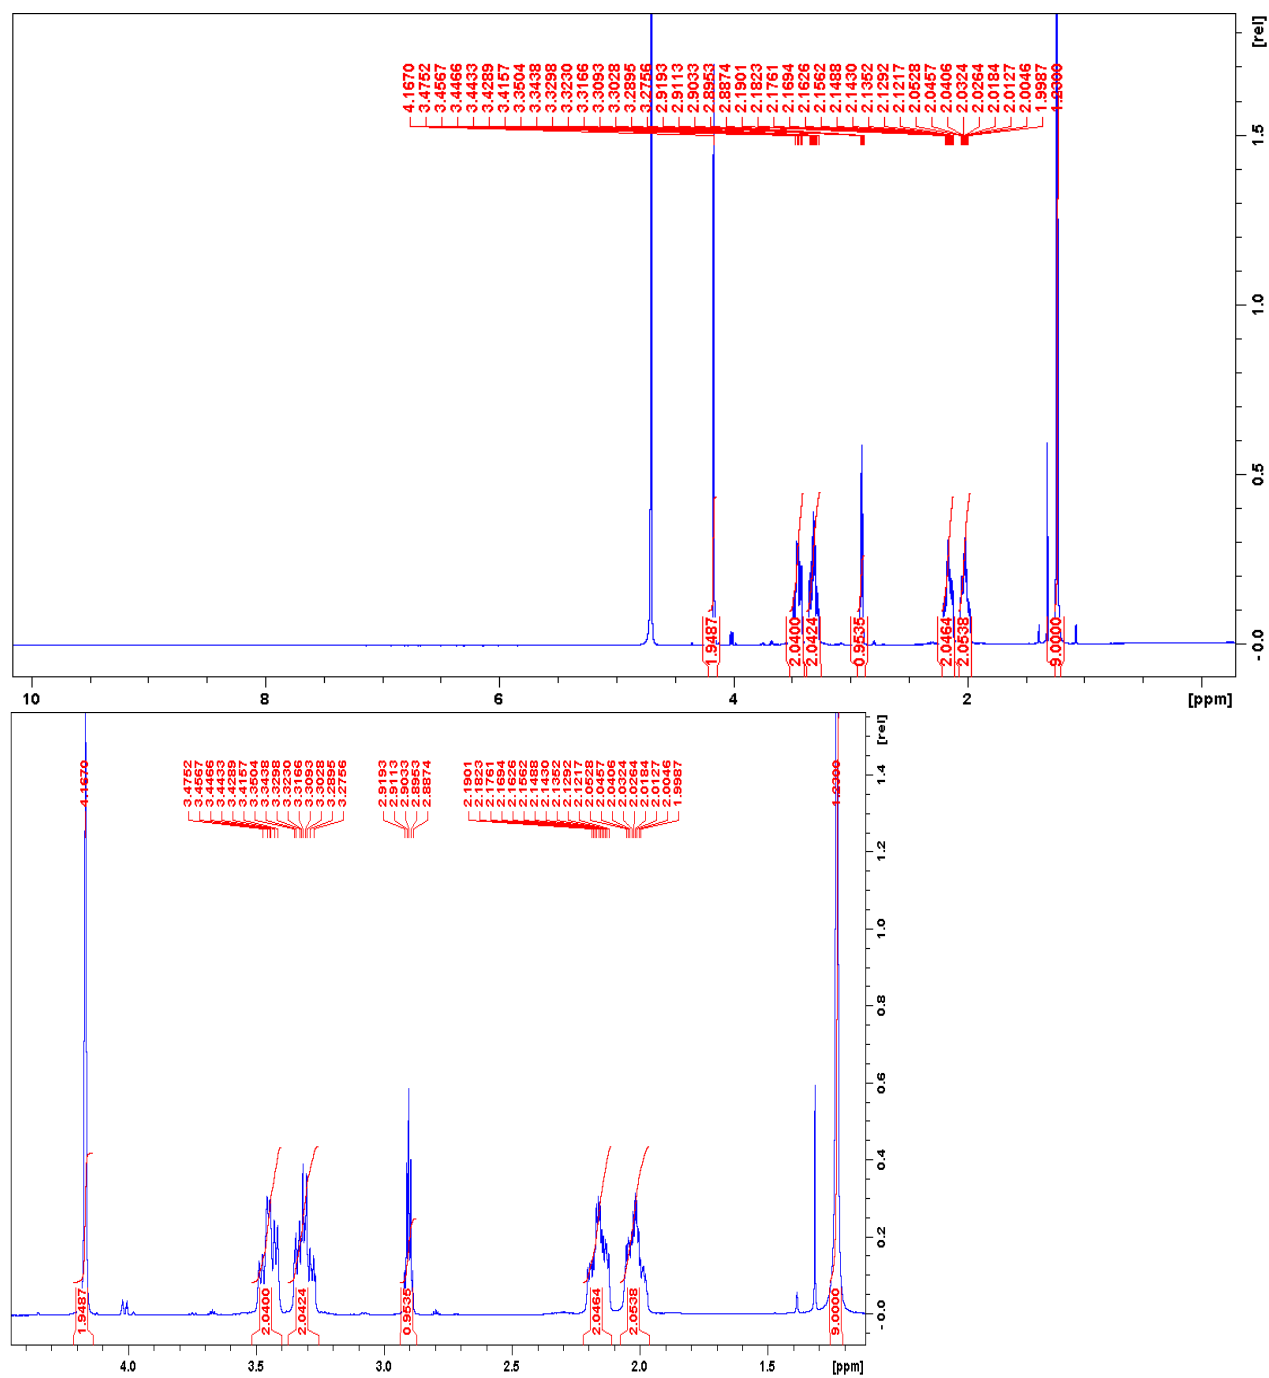

Figure S4.  $^1\text{H}$  NMR spectrum of (E)-2.

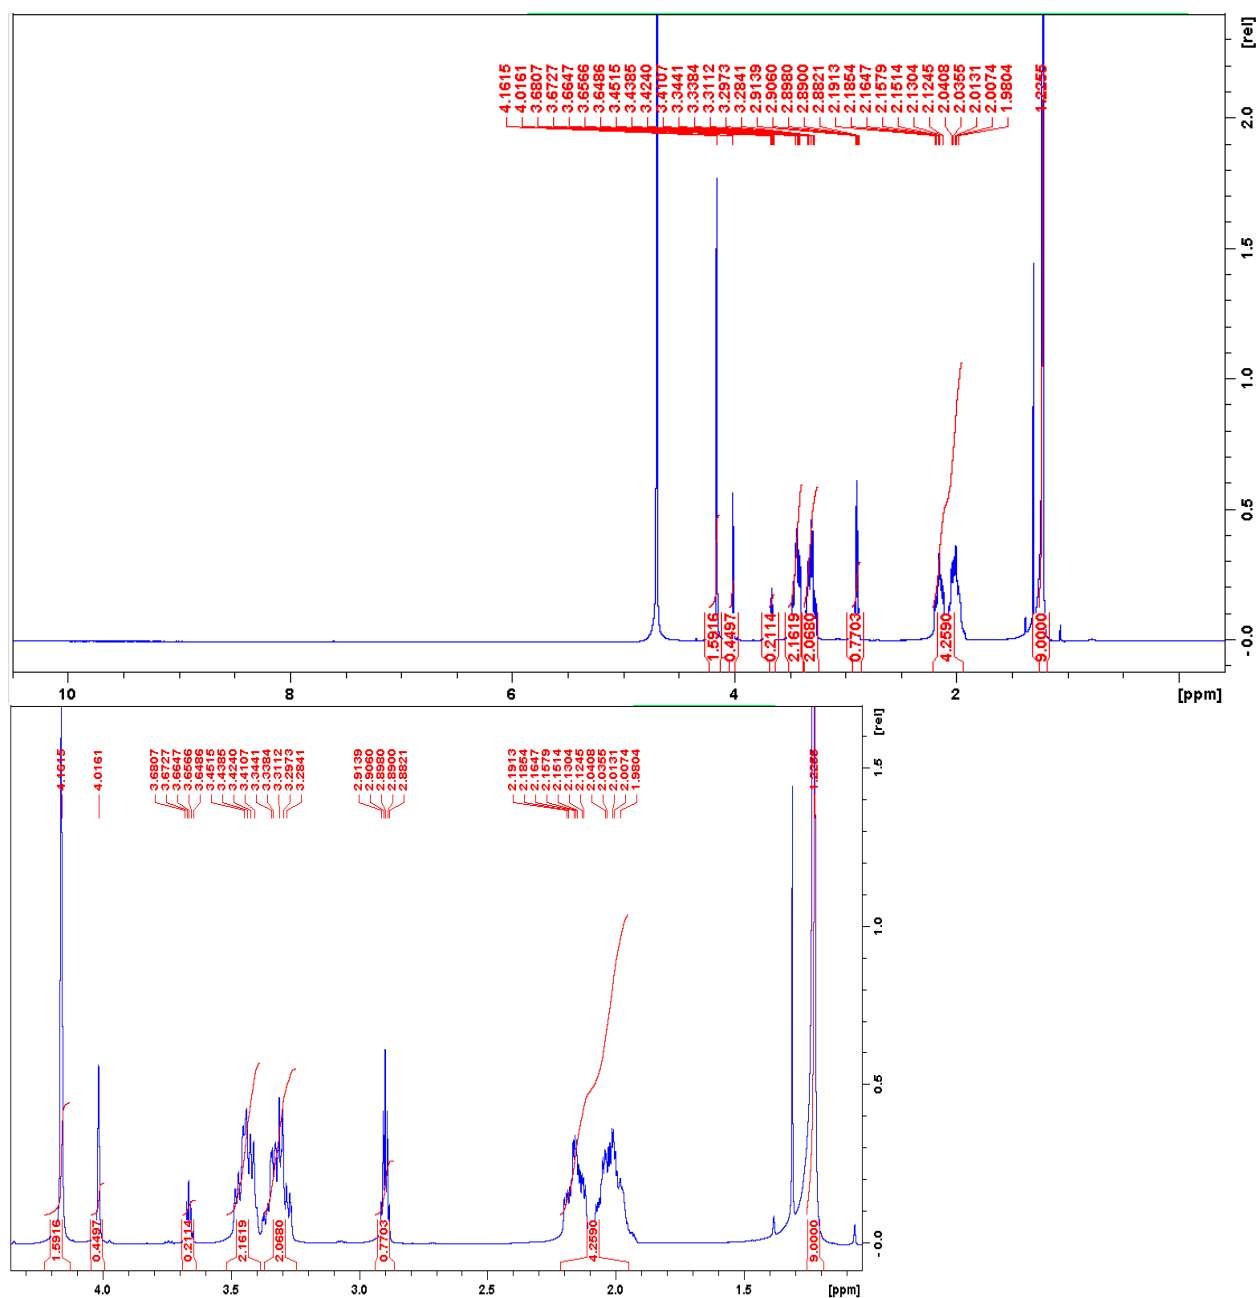

Figure S5.  $^1\text{H}$  NMR spectrum of (E)- and (Z)-2.

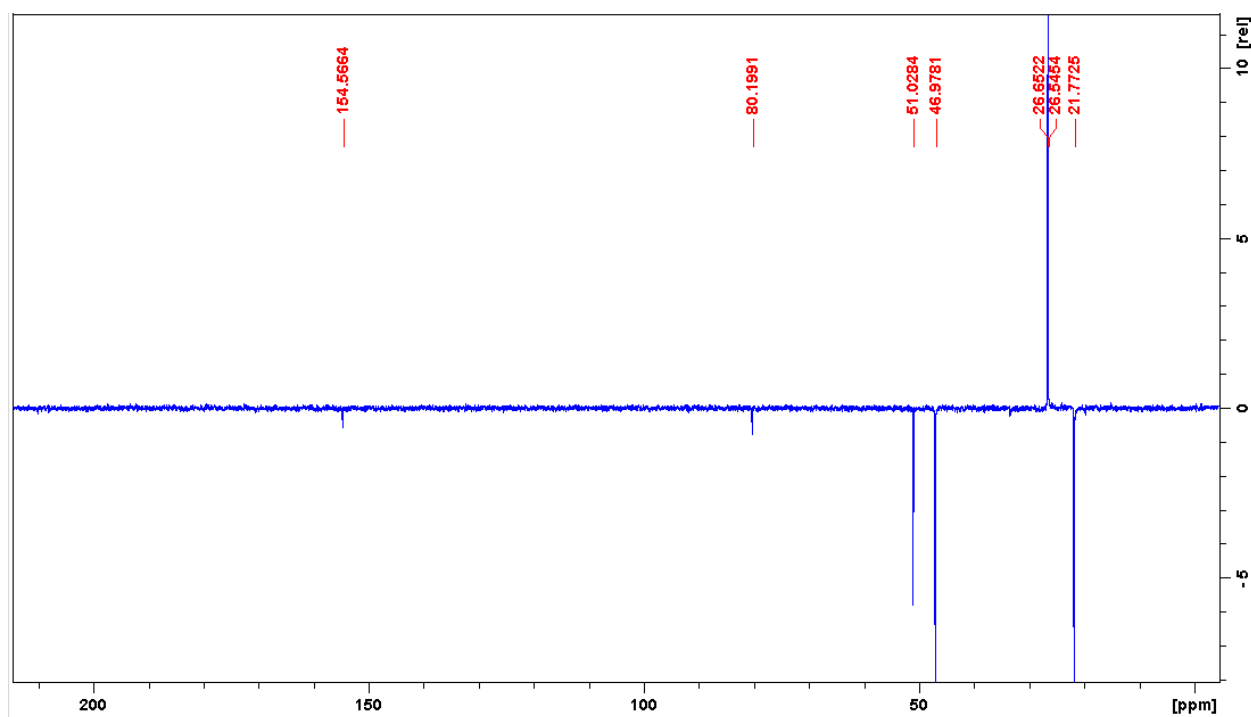

**Figure S6.** <sup>13</sup>C NMR spectrum of (E)-2.

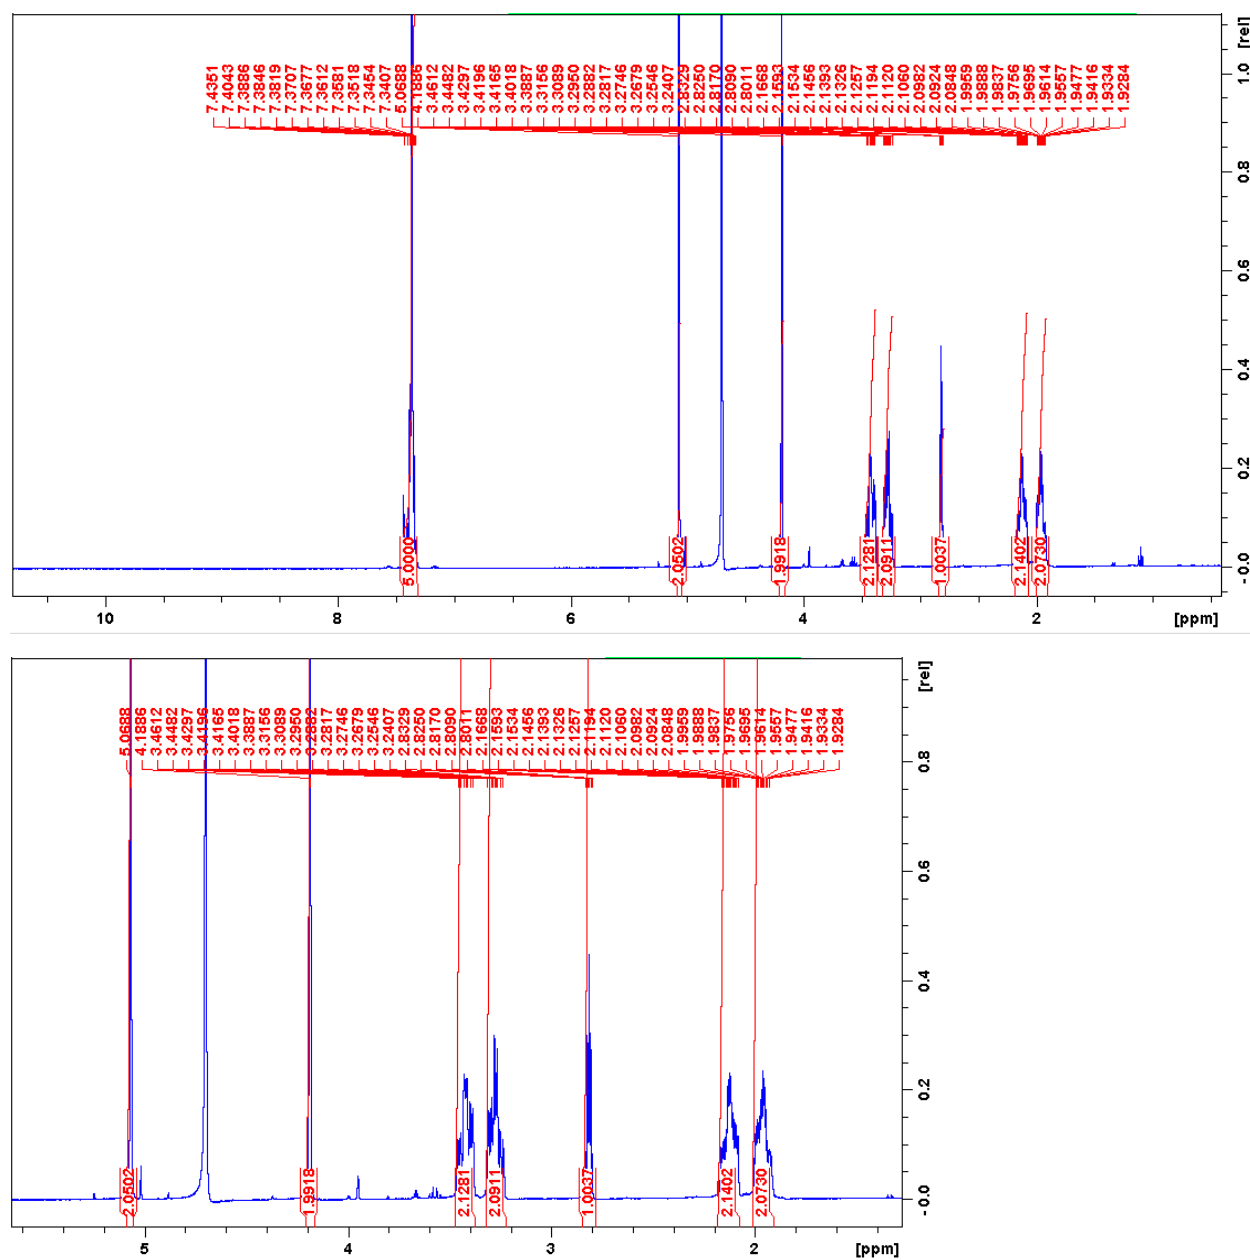

Figure S7.  $^1\text{H}$  NMR spectrum of (E)-3.



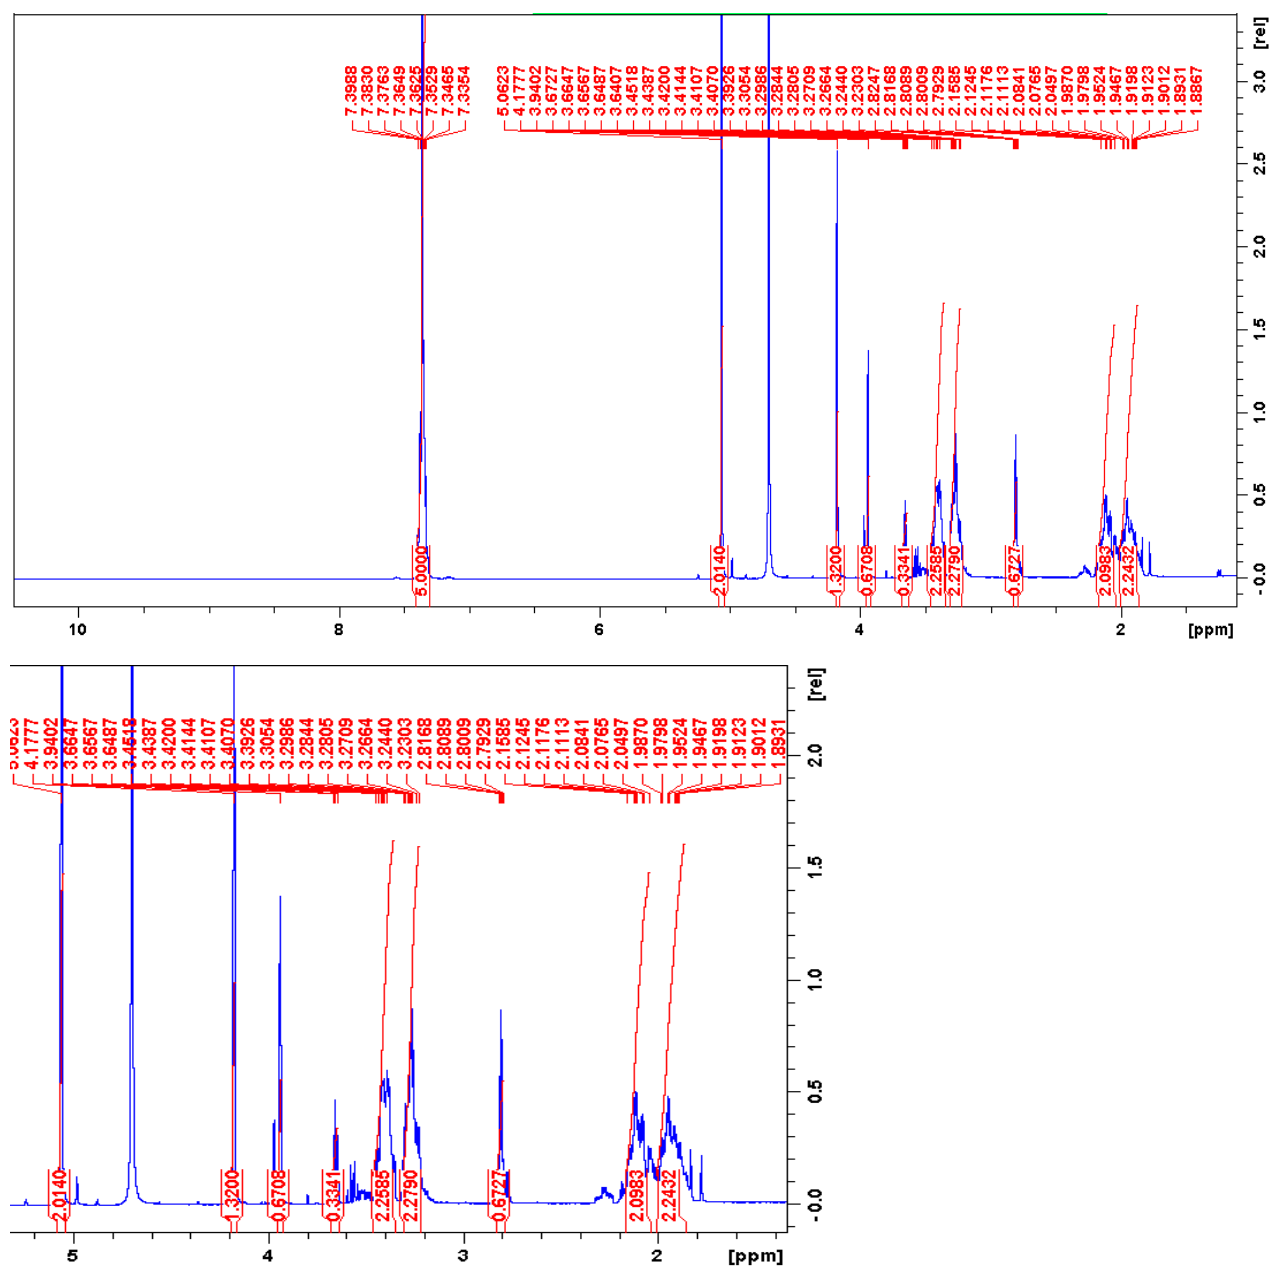

Figure S8.  $^1\text{H}$  NMR spectrum of (E)- and (Z)-3.

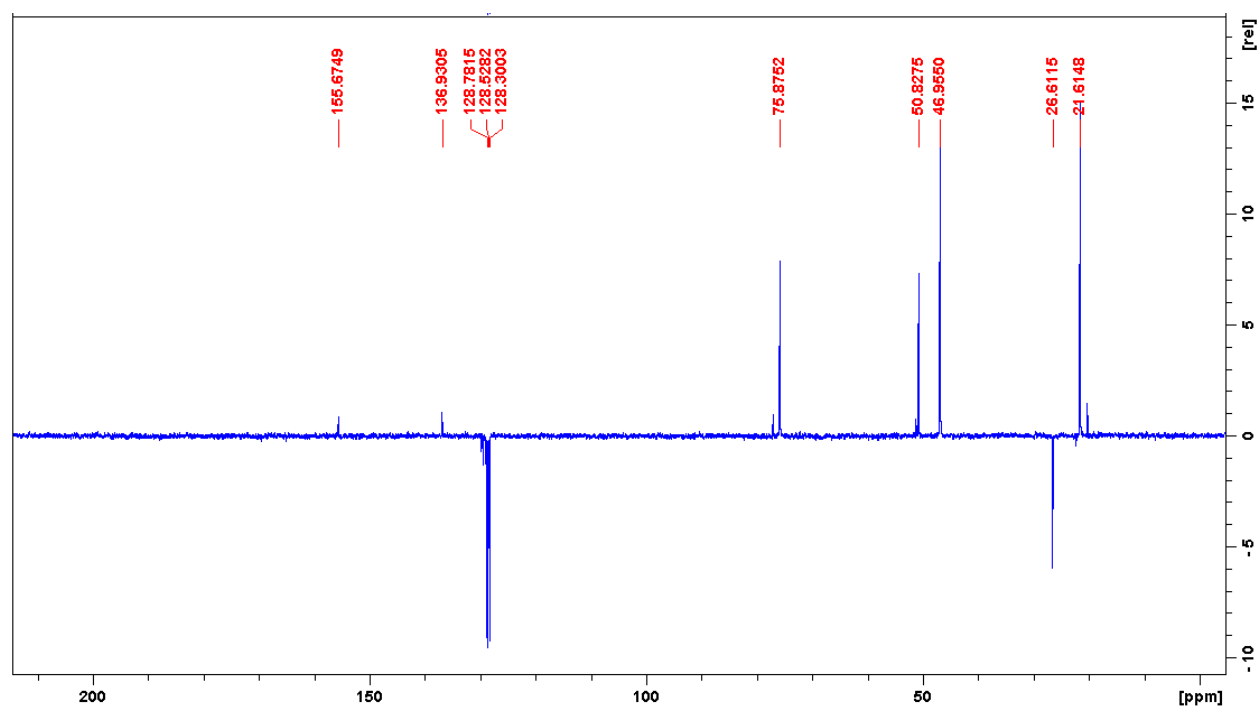

Figure S9. <sup>13</sup>C NMR spectrum of (E)-3.

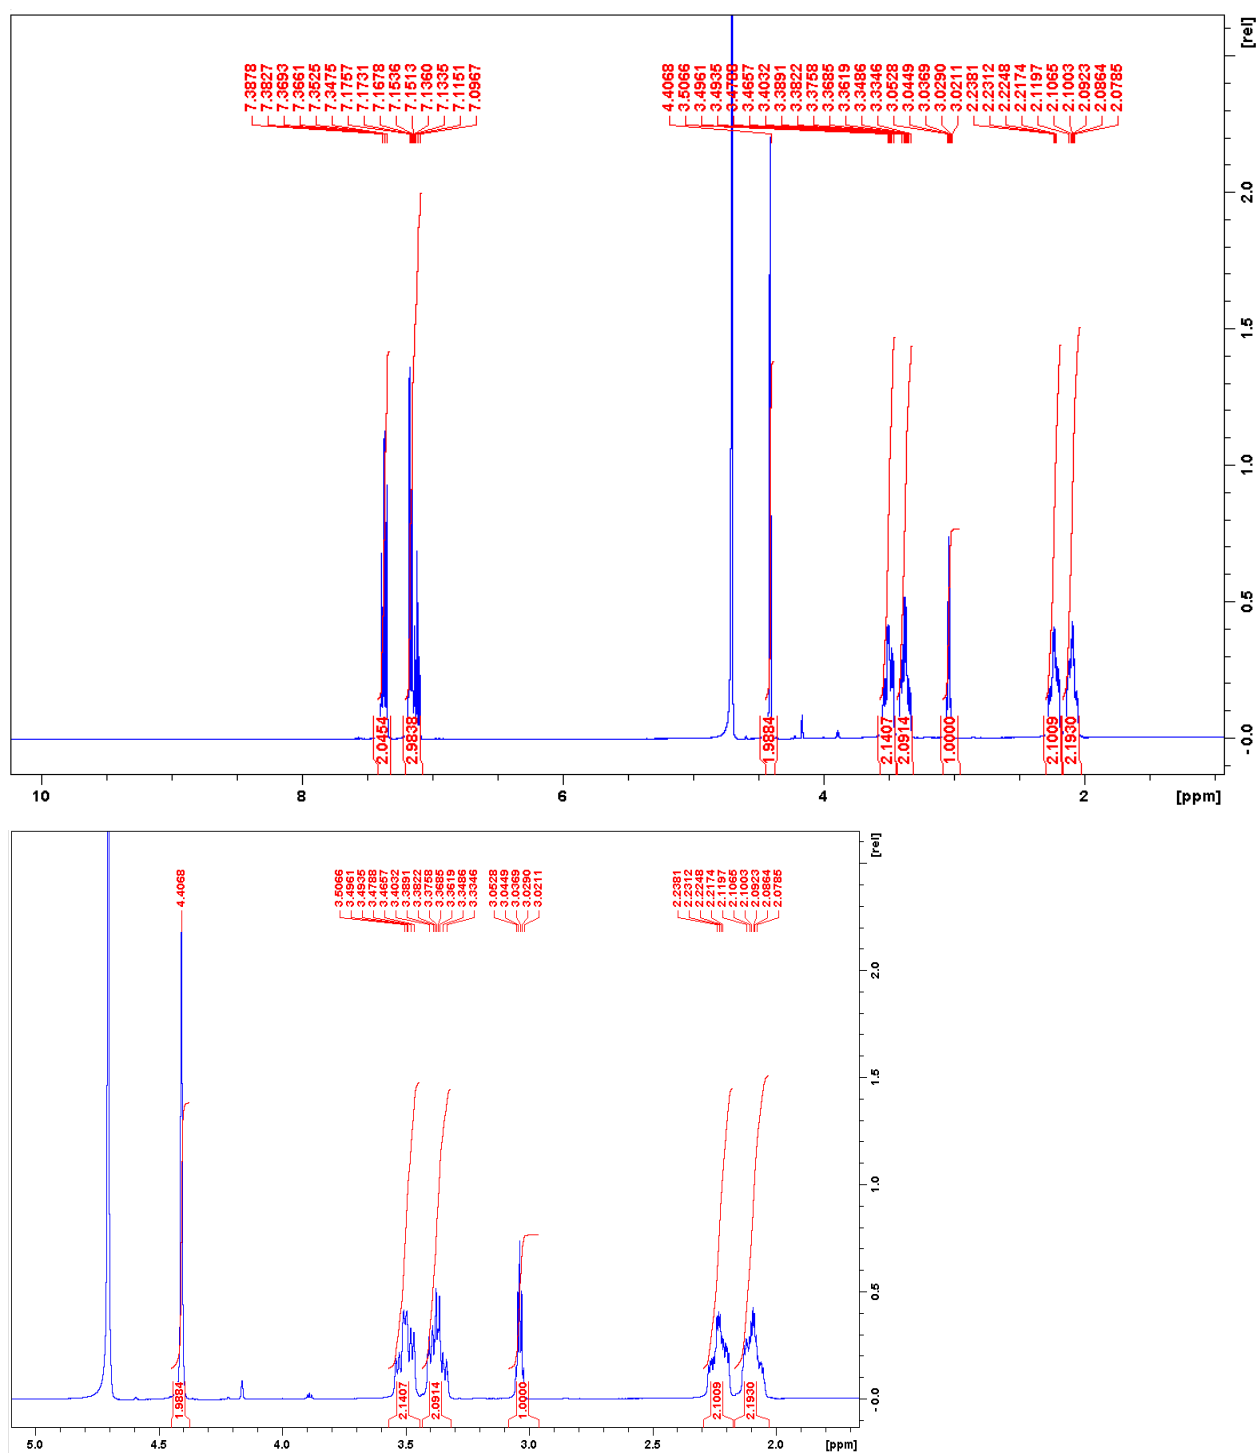

**Figure S10.**  $^1\text{H}$  NMR spectrum of (E)-4.

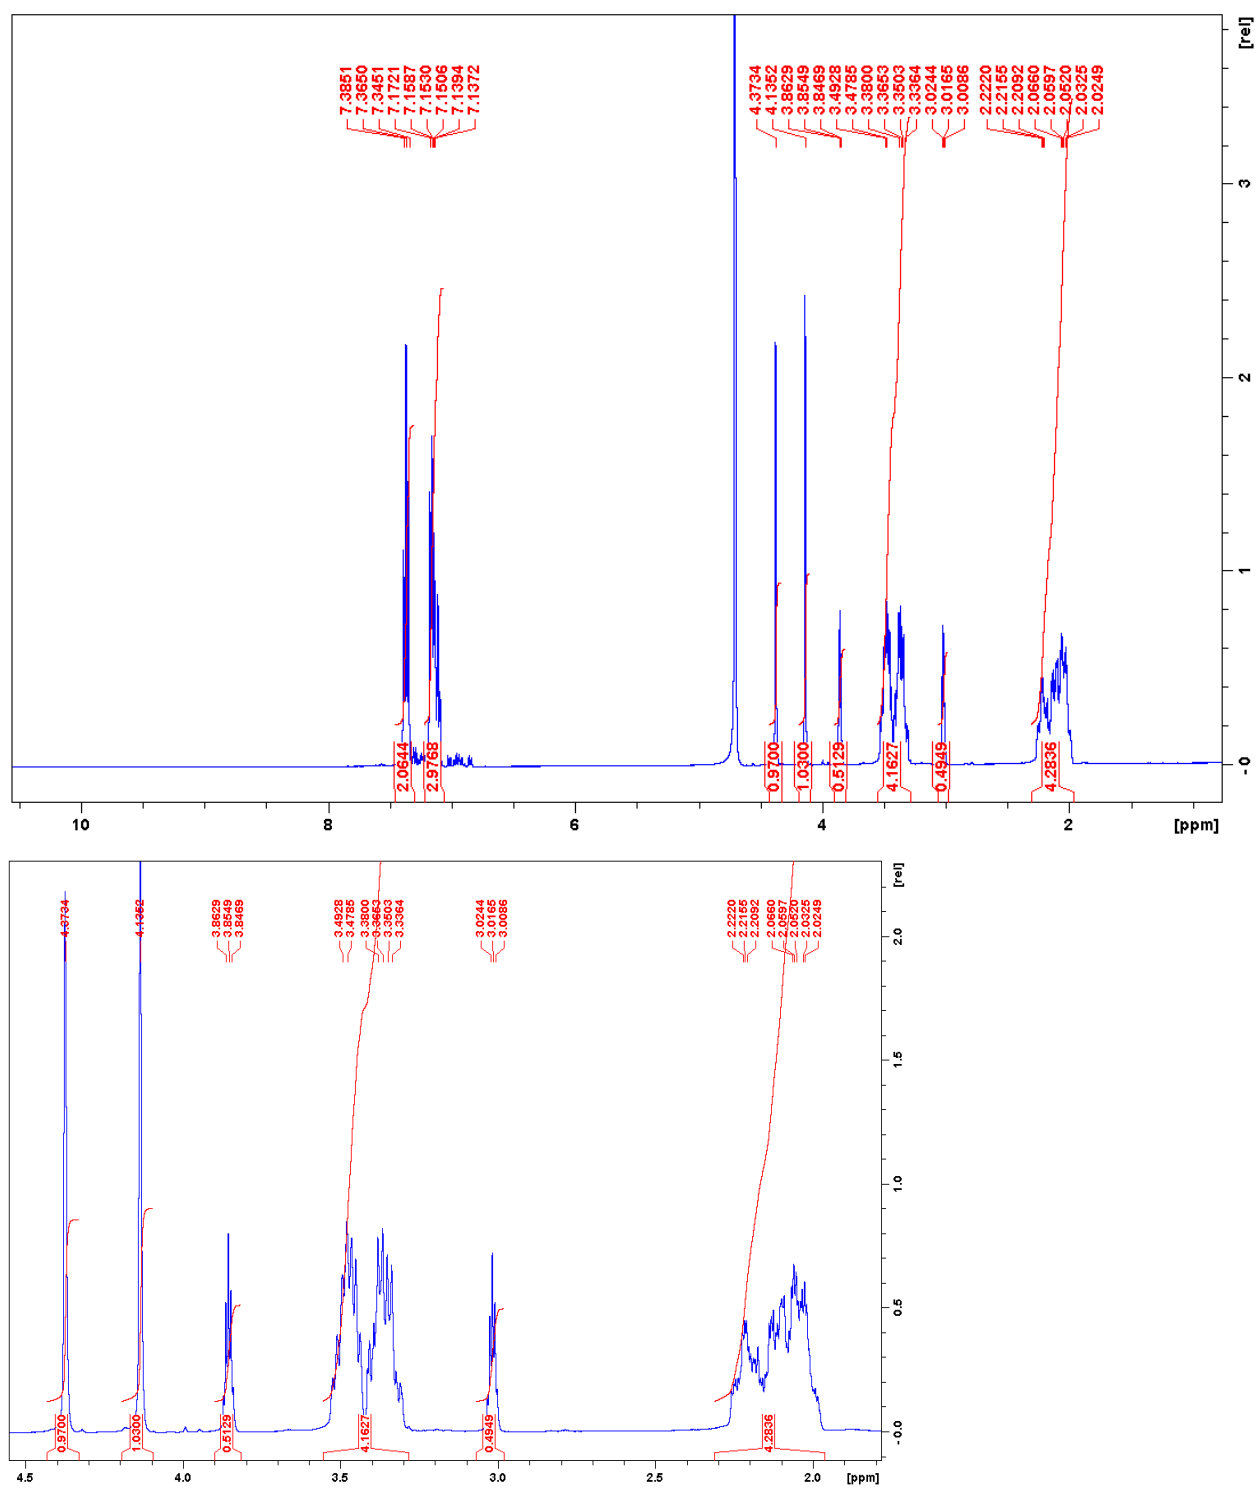

Figure S11.  $^1\text{H}$  NMR spectrum of (E)- and (Z)-4.

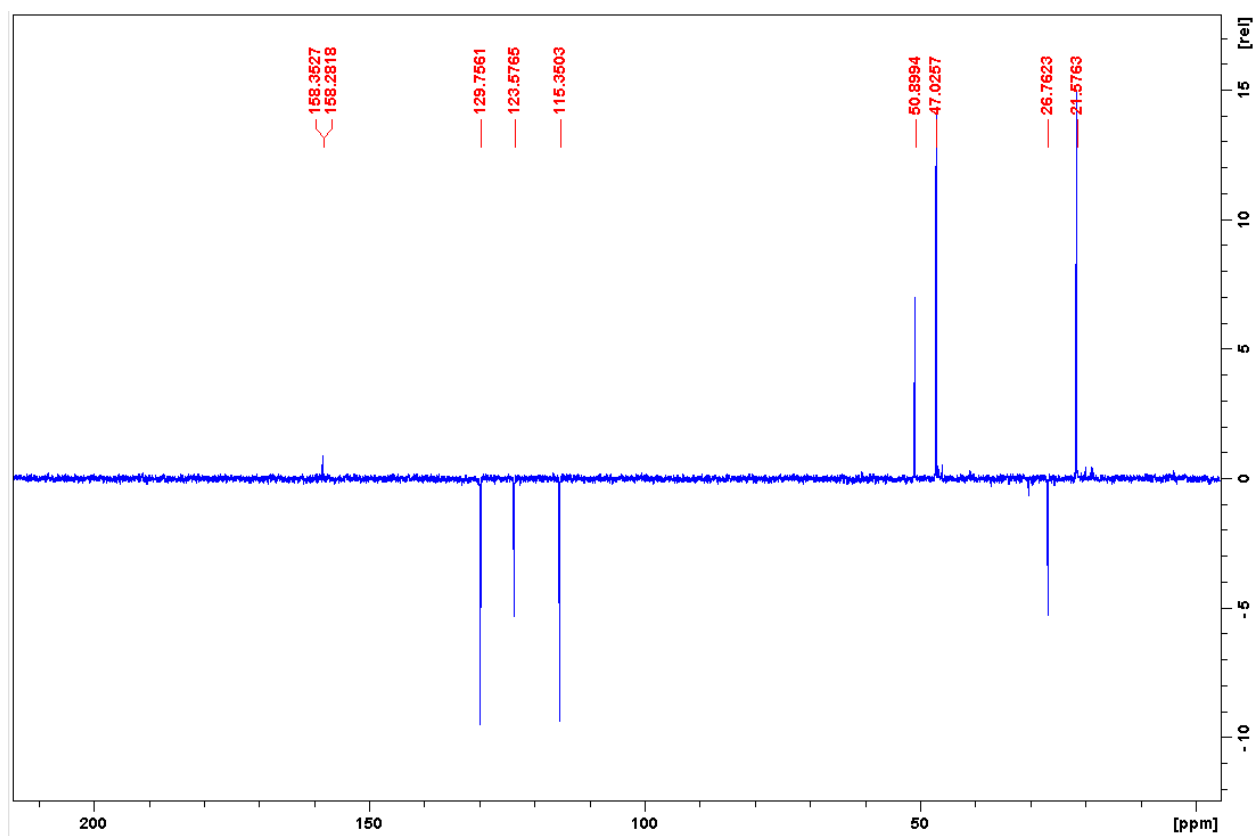

Figure S12. <sup>13</sup>C NMR spectrum of (E)-4.

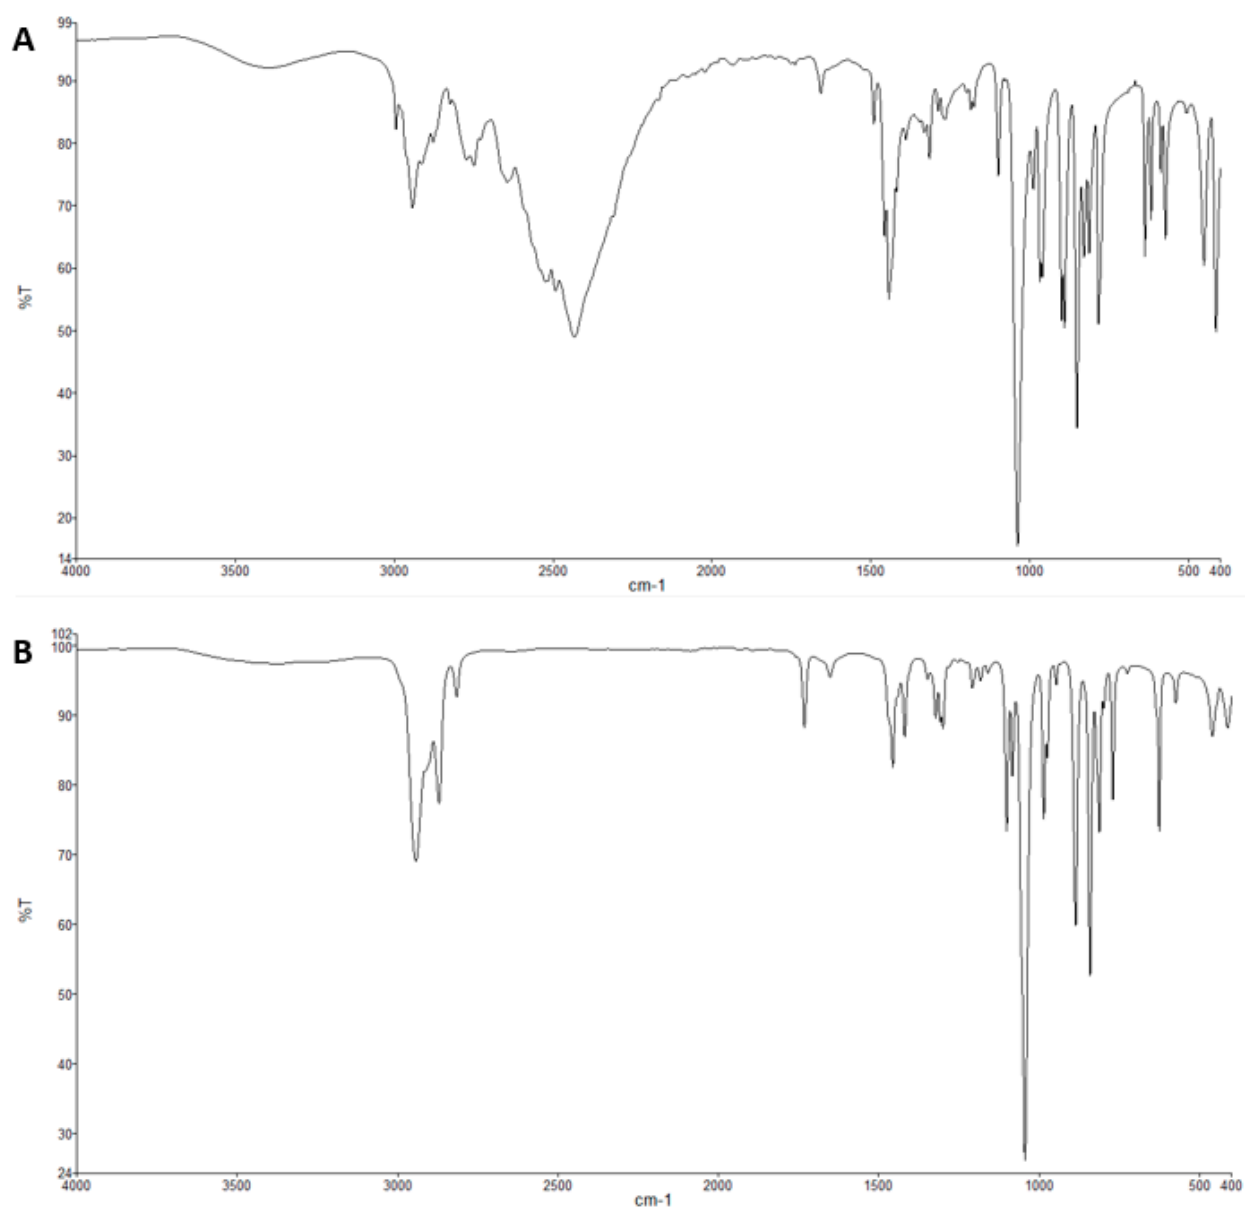

**Figure S13.** ATR spectrum of (A) (*E*)-1·HCl and (B) (*E*)-1.

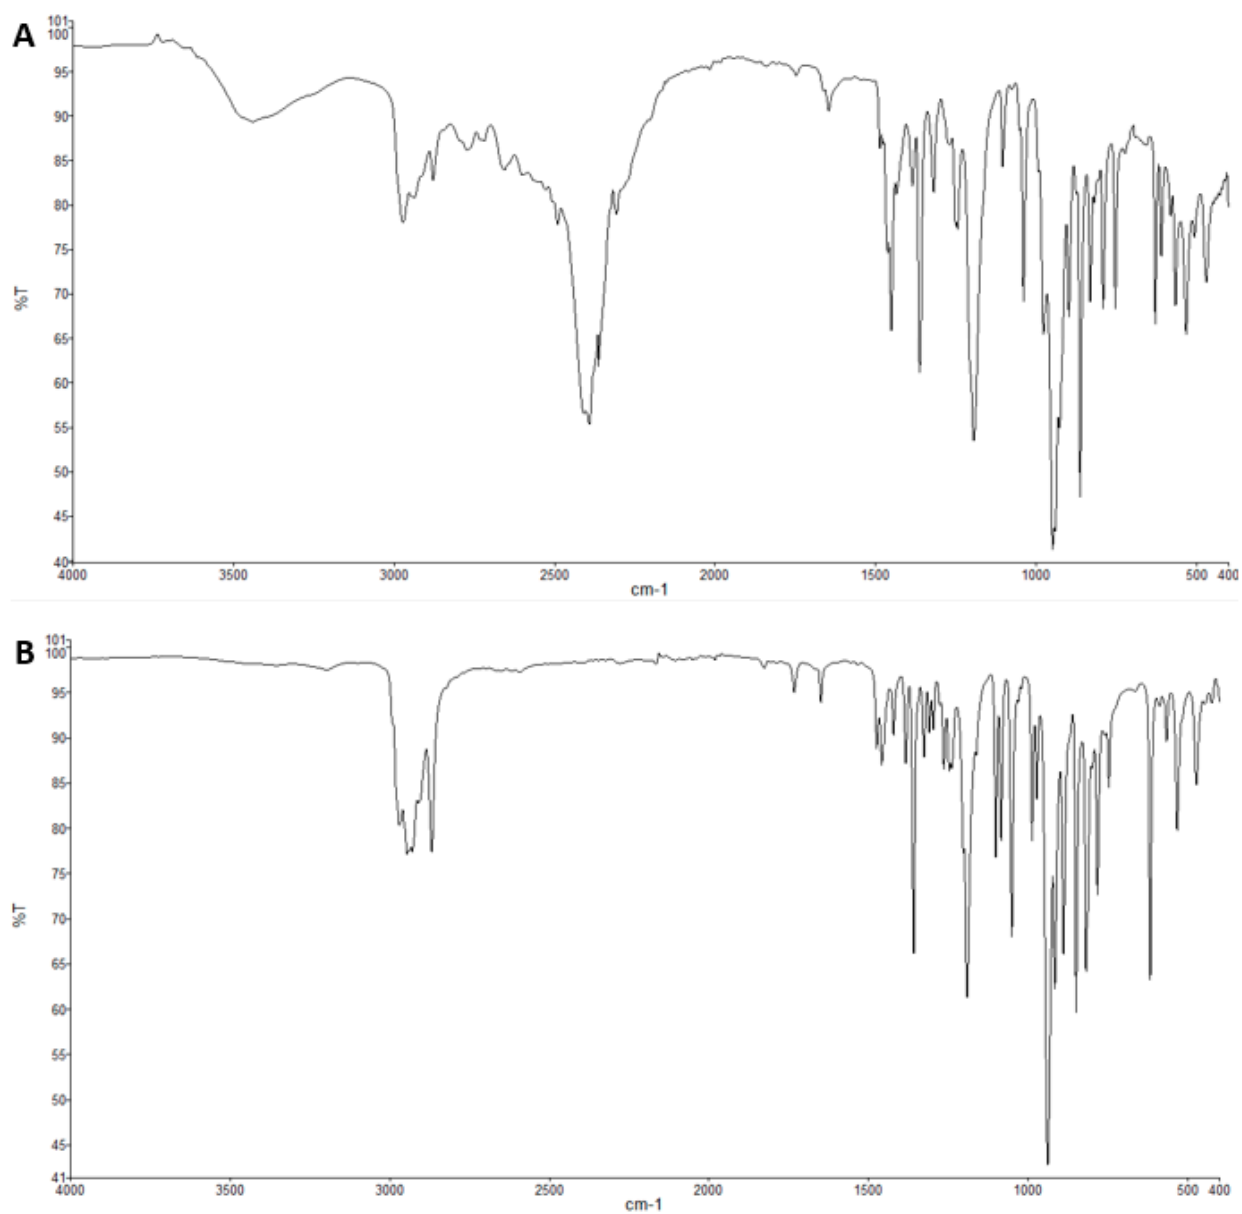

**Figure S14.** ATR spectrum of **A)**  $(E)\text{-2}\cdot\text{HCl}$  and **B)**  $(E)\text{-2}$ .

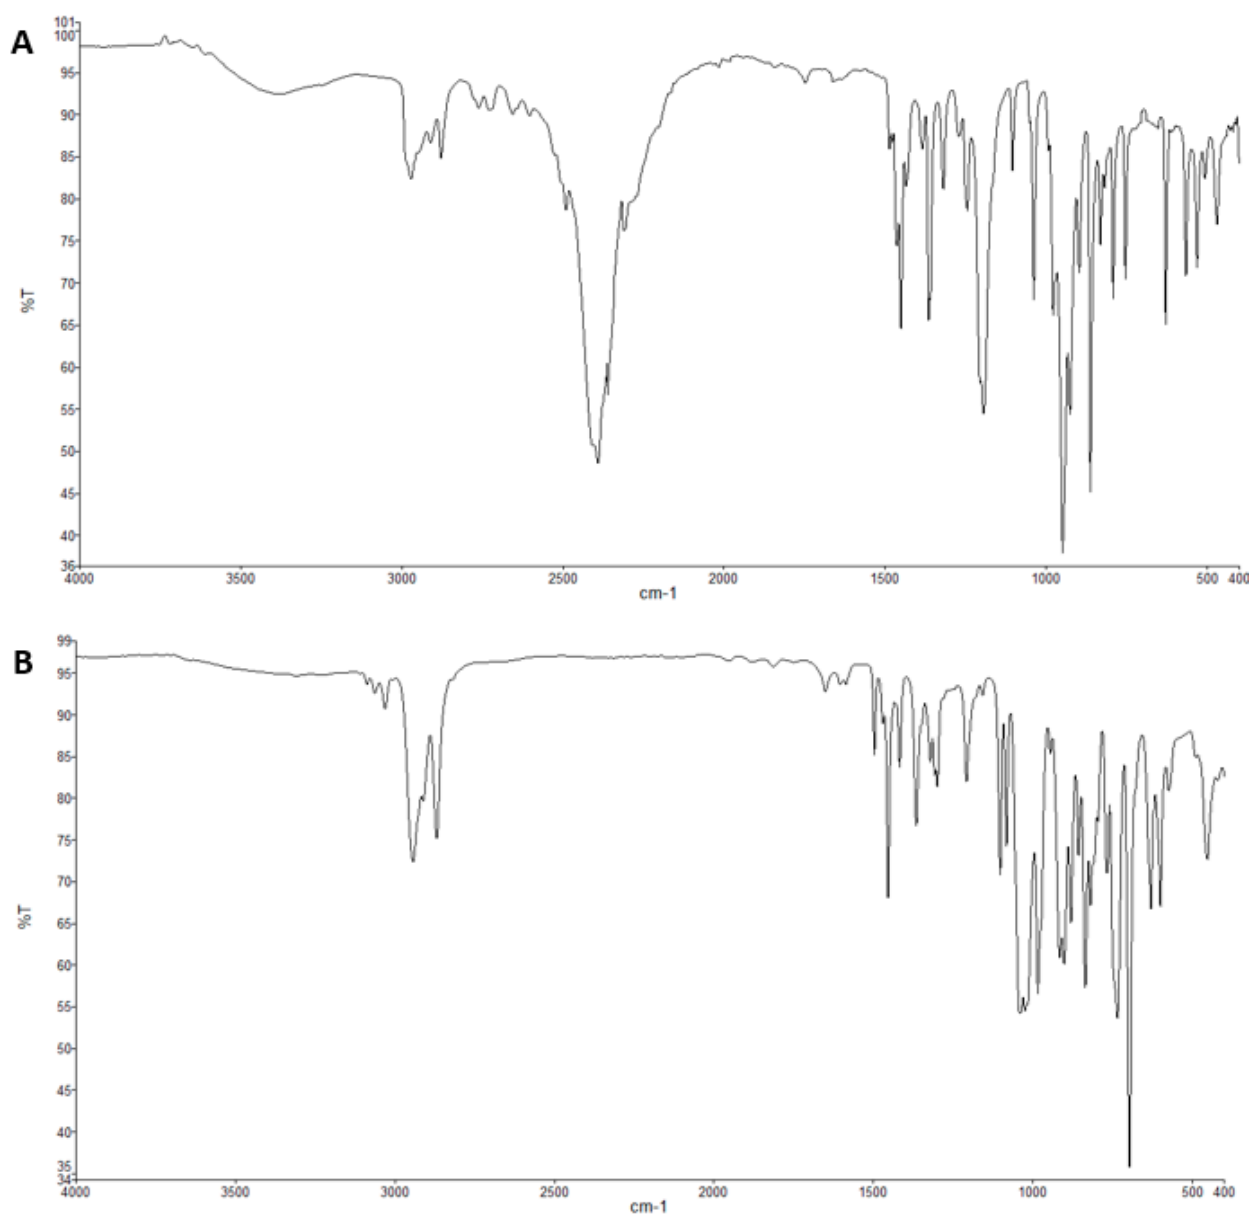

**Figure S15.** ATR spectrum of **A)** (*E*)-3·HCl and **B)** (*E*)-3.



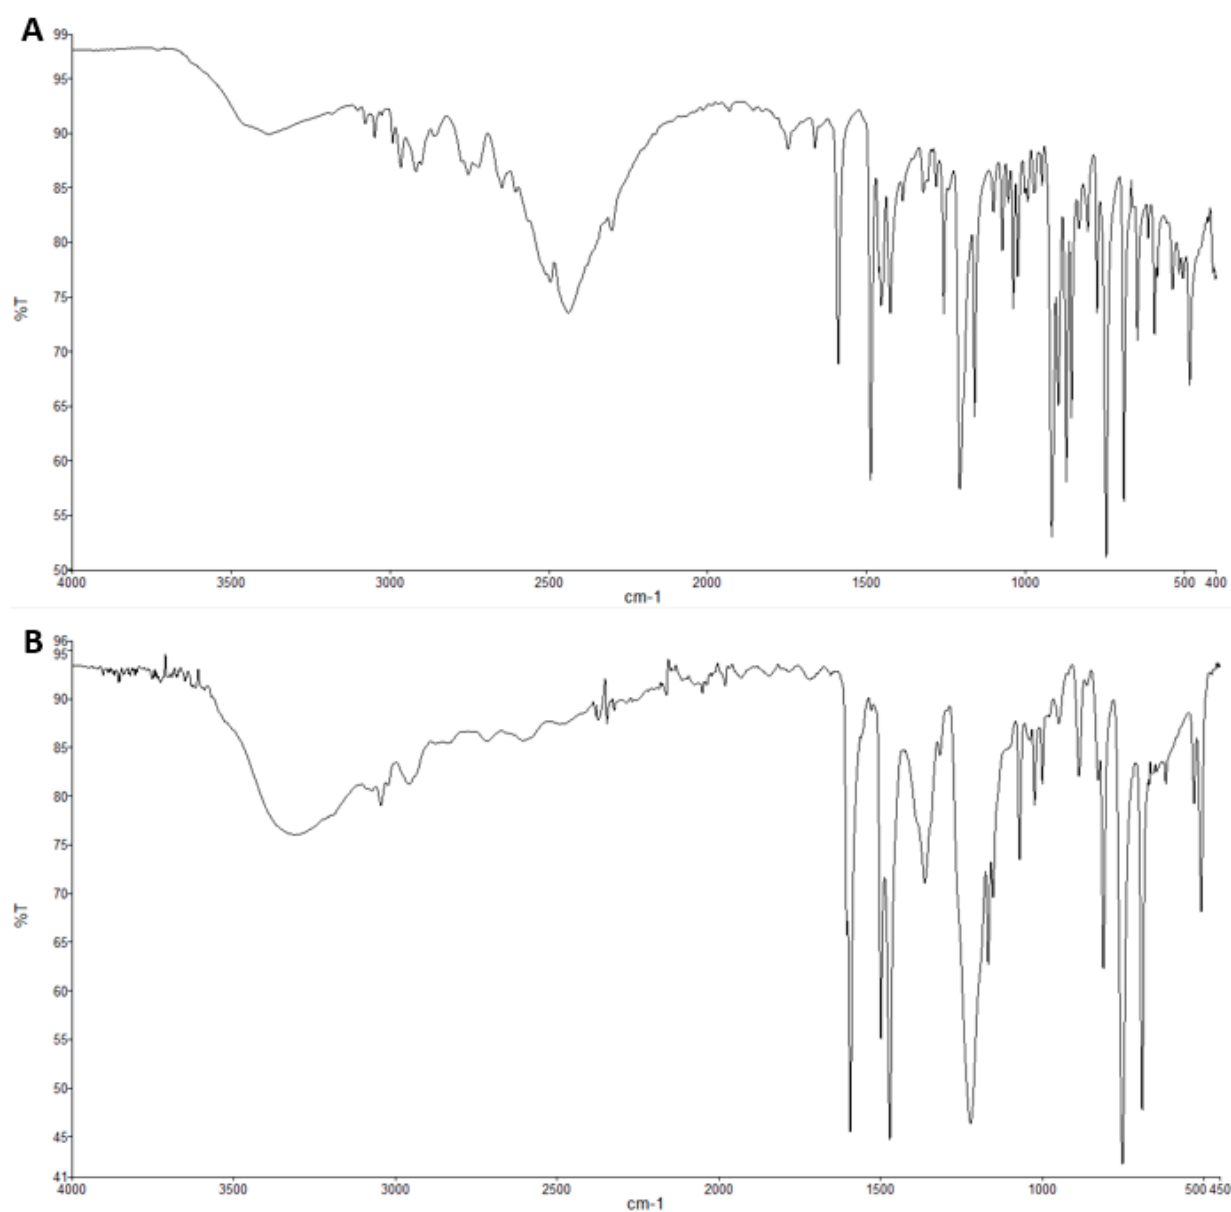

**Figure S16.** ATR spectrum of **A)** (*E*)-4·HCl and **B)** (*E*)-4

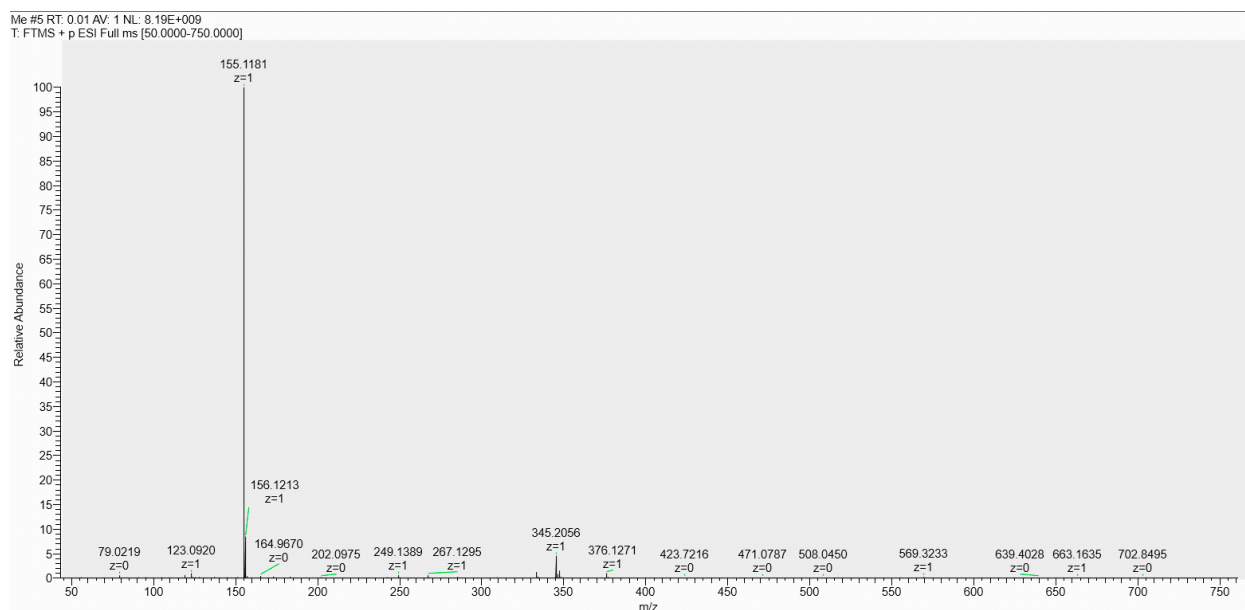

**Figure S17.** HRMS spectrum of (E)-1.

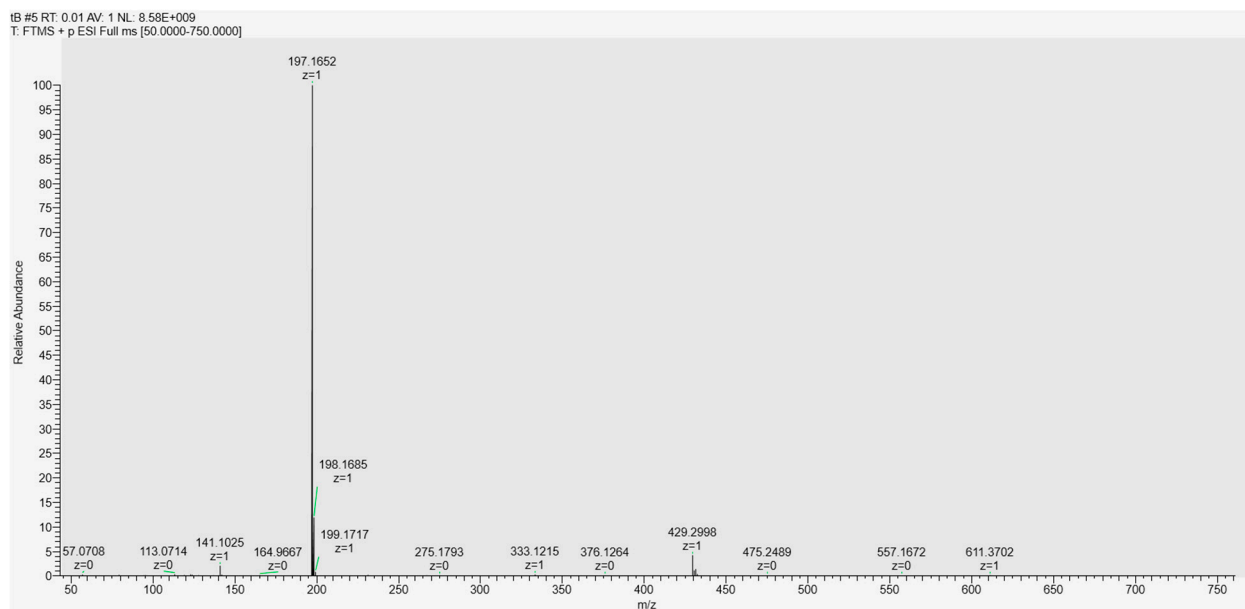

**Figure S18.** HRMS spectrum of (E)-2.

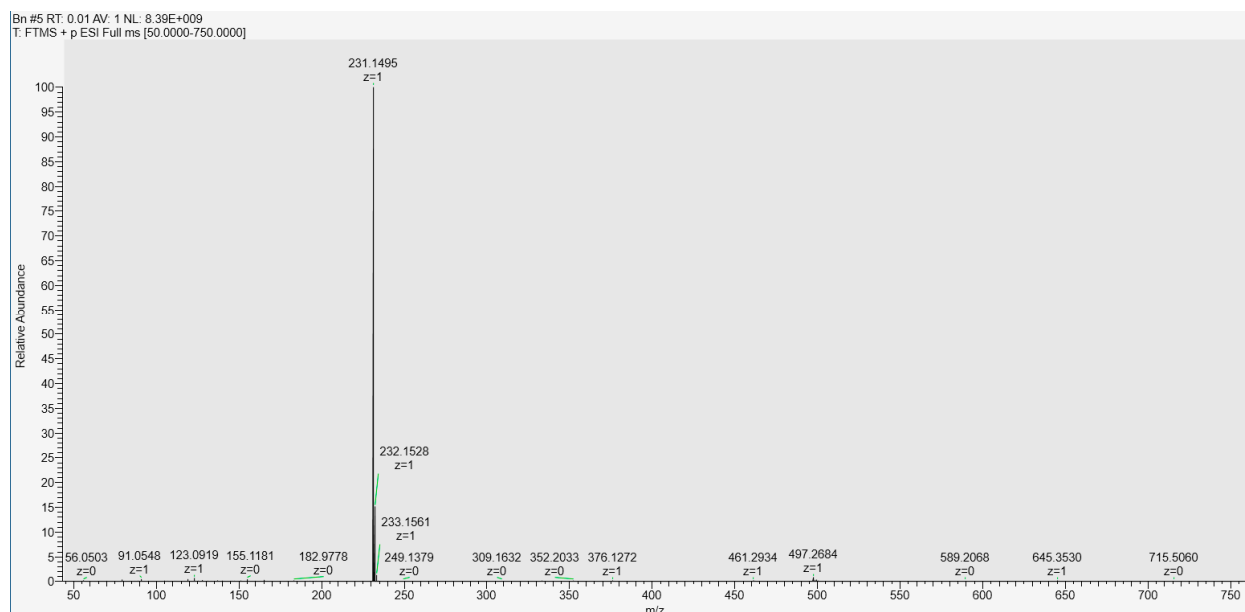

**Figure S19.** HRMS spectrum of (E)-3.

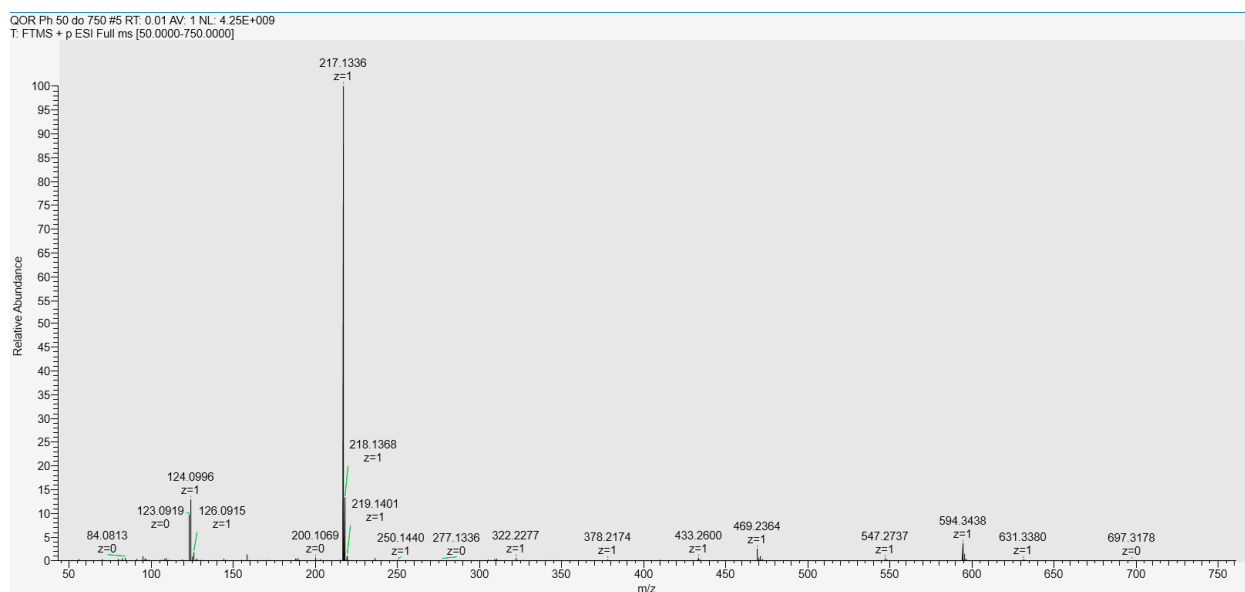

**Figure S20.** HRMS spectrum of (E)-4.

# Conformer **RI1-I**

29

0.000000

|   |                 |                 |                 |
|---|-----------------|-----------------|-----------------|
| C | -0.000000000000 | -0.000000000000 | 1.544218482439  |
| C | 0.000000000000  | 0.000000000000  | 0.000000000000  |
| N | 1.445842459742  | 0.000000000000  | -0.468284369464 |
| C | 2.208989502155  | -1.116962029390 | 0.211193385353  |
| C | 2.401259961458  | -0.731931773187 | 1.707882207289  |
| C | 1.402358082255  | 0.397767208133  | 2.042622145902  |
| C | 2.093871696472  | 1.346879288239  | -0.170279489911 |
| C | 1.848843163828  | 1.680877634863  | 1.314426881731  |
| N | 2.115579033642  | -1.899355168265 | 2.516756399193  |
| H | -0.268601762371 | -0.984182049505 | 1.926786106475  |
| H | -0.740958798474 | 0.713172758686  | 1.906845628574  |
| H | -0.464360035489 | 0.889128950595  | -0.426943183012 |
| H | -0.479068853614 | -0.881734563549 | -0.425102348115 |
| H | 3.167707230179  | -1.224078678735 | -0.291592448944 |
| H | 1.627955275382  | -2.030077982854 | 0.099279712046  |
| H | 1.396636168584  | 0.561132143194  | 3.120874871747  |
| H | 1.653913243801  | 2.071934492481  | -0.854682505936 |
| H | 3.154058073446  | 1.234881153380  | -0.393686372452 |
| H | 2.763801493350  | 2.076454893033  | 1.749120632864  |
| H | 1.070510447557  | 2.439546442038  | 1.415906006113  |
| O | 3.107800458472  | -2.873816424713 | 2.141400447581  |
| C | 2.591867490139  | -4.197346016016 | 2.328310294173  |
| H | 3.387922253231  | -4.865186474699 | 1.999497683600  |
| H | 1.690853744965  | -4.352452696452 | 1.728045709770  |
| H | 2.369271432171  | -4.384211505092 | 3.382882618298  |
| H | 1.467718003744  | -0.157371694760 | -1.476334104078 |
| O | 3.705800662056  | -0.208842398914 | 1.916484940328  |
| H | 2.325156959146  | -1.664685733924 | 3.489952714141  |
| H | 4.330197963815  | -0.947133552170 | 1.938703073026  |

# Conformer **RI1-II**

29

0.931530

|   |                 |                 |                 |
|---|-----------------|-----------------|-----------------|
| C | 0.000000000000  | 0.000000000000  | 1.541486478836  |
| C | 0.000000000000  | 0.000000000000  | 0.000000000000  |
| N | 1.444359552408  | 0.000000000000  | -0.476246609900 |
| C | 2.100237849303  | -1.327653464331 | -0.163414539962 |
| C | 1.939248869973  | -1.620274308911 | 1.358605347691  |
| C | 1.416757231504  | -0.338228048233 | 2.043397040693  |
| C | 2.217292661935  | 1.136172865872  | 0.176406273133  |
| C | 2.366949818081  | 0.818658511714  | 1.681011219981  |
| N | 0.963414060222  | -2.687239647051 | 1.521933268224  |
| H | -0.732534189483 | -0.721902046016 | 1.897501510966  |
| H | -0.287322299183 | 0.981156214969  | 1.924512958361  |
| H | -0.480176880034 | 0.878710299311  | -0.430209059272 |
| H | -0.459804640280 | -0.898319985249 | -0.410134706358 |
| H | 3.153504325839  | -1.238798627822 | -0.423640170603 |
| H | 1.630275518189  | -2.094016774348 | -0.775835801901 |
| H | 1.423715988842  | -0.498902925065 | 3.121794526765  |
| H | 1.647851555199  | 2.046151324736  | -0.014082903108 |
| H | 3.174881412567  | 1.210046439385  | -0.338733035223 |
| H | 3.393870825654  | 0.542993037460  | 1.916450627627  |
| H | 2.116389578549  | 1.703388788945  | 2.267187508333  |
| O | 1.577884537940  | -3.862588672402 | 0.963556645563  |
| C | 0.572508622629  | -4.764130741558 | 0.486984156447  |
| H | 1.118934639874  | -5.608914273934 | 0.068087998767  |
| H | -0.044197243720 | -4.290006814985 | -0.282442802633 |
| H | -0.063340997939 | -5.110092261815 | 1.307200104054  |
| H | 1.454948988834  | 0.135525432087  | -1.487873070657 |
| O | 3.195521639056  | -1.919399720930 | 1.935945978337  |
| H | 0.882870421647  | -2.882945969225 | 2.522951647158  |
| H | 3.433346884849  | -2.827523558257 | 1.703030698206  |

Conformer **RI1-III**

29

1.105472

|   |                 |                 |                 |
|---|-----------------|-----------------|-----------------|
| C | -0.000000000000 | 0.000000000000  | 1.544329075261  |
| C | 0.000000000000  | 0.000000000000  | 0.000000000000  |
| N | 1.446168701919  | 0.000000000000  | -0.472515232783 |
| C | 2.211503295434  | -1.126373122083 | 0.180521596400  |
| C | 2.382686646255  | -0.803177023789 | 1.683182849947  |
| C | 1.413914680616  | 0.352528744295  | 2.043460241873  |
| C | 2.106094435072  | 1.336935328556  | -0.155443988910 |
| C | 1.888387282396  | 1.638234037559  | 1.341058820470  |
| N | 2.045804020930  | -2.003650741081 | 2.437373200941  |
| H | -0.295370772087 | -0.977410496896 | 1.923847264448  |
| H | -0.721113547416 | 0.733292941229  | 1.907342396332  |
| H | -0.463360596430 | 0.889036264140  | -0.428111726888 |
| H | -0.478111568568 | -0.881821634073 | -0.426389640930 |
| H | 3.186141578507  | -1.201234661715 | -0.299310679532 |
| H | 1.641473756902  | -2.042572297006 | 0.024858612278  |
| H | 1.416567487854  | 0.484153642851  | 3.124740053517  |
| H | 1.657151990901  | 2.078038976392  | -0.816424107050 |
| H | 3.161116847105  | 1.224886687650  | -0.403038375713 |
| H | 2.821392819345  | 1.996696755324  | 1.770364216845  |
| H | 1.137568816113  | 2.419999275795  | 1.470182790148  |
| O | 2.419530861992  | -1.745226850415 | 3.796575332652  |
| C | 1.373077072412  | -2.156387228505 | 4.686063977346  |
| H | 1.747635776021  | -1.938915690529 | 5.686297000338  |
| H | 1.177921732372  | -3.227260931046 | 4.588575070262  |
| H | 0.453820799496  | -1.593298647211 | 4.498677152904  |
| H | 1.463488385424  | -0.140989930506 | -1.483292665175 |
| O | 3.738663827195  | -0.410183588373 | 1.840635661493  |
| H | 2.674785717957  | -2.754922579515 | 2.146623007191  |
| H | 3.936898957034  | -0.399357289670 | 2.787878550424  |

Conformer **RI1-IV**

29

1.464099

|   |                 |                 |                 |
|---|-----------------|-----------------|-----------------|
| C | 0.000000000000  | -0.000000000000 | 1.541355466175  |
| C | 0.000000000000  | 0.000000000000  | 0.000000000000  |
| N | 1.446804071804  | 0.000000000000  | -0.475914038478 |
| C | 2.104266028928  | -1.323957932750 | -0.164629888437 |
| C | 1.929772120547  | -1.626856228509 | 1.342320186147  |
| C | 1.415477958623  | -0.343000294515 | 2.041246526449  |
| C | 2.219159534417  | 1.136040870625  | 0.180142497850  |
| C | 2.369308640539  | 0.810843071532  | 1.682596714359  |
| N | 0.953571667090  | -2.703205443718 | 1.464047681525  |
| H | -0.727492927334 | -0.725534307099 | 1.898024055551  |
| H | -0.290099108719 | 0.980606867197  | 1.923876077143  |
| H | -0.477049250723 | 0.879348574970  | -0.432387411089 |
| H | -0.459497257461 | -0.897950721557 | -0.411625439586 |
| H | 3.162981767512  | -1.240591786106 | -0.405249344154 |
| H | 1.641538472963  | -2.082341993586 | -0.796504035092 |
| H | 1.409885853730  | -0.514710650915 | 3.116301611615  |
| H | 1.645976774049  | 2.044343052209  | -0.006915956545 |
| H | 3.175515733204  | 1.214074290674  | -0.336776511012 |
| H | 3.396153262777  | 0.527349063251  | 1.910487093465  |
| H | 2.128301770939  | 1.695815903896  | 2.272323845900  |
| O | 0.901254994918  | -3.028950587684 | 2.860996289104  |
| C | -0.385054537376 | -3.557853793236 | 3.199104971916  |
| H | -0.340065838440 | -3.757135294894 | 4.269535152086  |
| H | -0.579300777691 | -4.490904262378 | 2.661465465084  |
| H | -1.176843671194 | -2.834911821247 | 2.983430042893  |
| H | 1.458530695341  | 0.136840746024  | -1.487290178214 |
| O | 3.219804859131  | -1.990131839169 | 1.804001368044  |
| H | 1.355425209766  | -3.533770165720 | 1.019856650701  |
| H | 3.128192660428  | -2.372941879183 | 2.687574200442  |

# Conformer **RI2-I**

38

0.000000

|   |                 |                 |                 |
|---|-----------------|-----------------|-----------------|
| C | -0.000000000000 | 0.000000000000  | 1.544160848843  |
| C | 0.000000000000  | 0.000000000000  | 0.000000000000  |
| N | 1.445649722160  | 0.000000000000  | -0.467227956339 |
| C | 2.205816626410  | -1.117553596941 | 0.215526208974  |
| C | 2.400409382481  | -0.728984114231 | 1.709942537549  |
| C | 1.401521123606  | 0.401216396984  | 2.042151134868  |
| C | 2.093363961741  | 1.346933392577  | -0.171299568479 |
| C | 1.845617784809  | 1.683948563944  | 1.312155469291  |
| N | 2.121458893871  | -1.890837832892 | 2.526837990565  |
| H | -0.264346552047 | -0.985448706810 | 1.926535522895  |
| H | -0.743770972225 | 0.710296676603  | 1.906806885330  |
| H | -0.465001742610 | 0.888938954314  | -0.426738045085 |
| H | -0.478404609475 | -0.882239572763 | -0.424791283875 |
| H | 3.163918363373  | -1.229780792208 | -0.287077075218 |
| H | 1.621451429249  | -2.027953018279 | 0.107792800232  |
| H | 1.394928759218  | 0.566142147694  | 3.120178594563  |
| H | 1.655219063761  | 2.070922639842  | -0.858076993149 |
| H | 3.154005848144  | 1.233490627939  | -0.391550354531 |
| H | 2.759572629094  | 2.081581390624  | 1.747078013411  |
| H | 1.066047410629  | 2.441844210690  | 1.410822345464  |
| O | 3.131320952432  | -2.851371278325 | 2.169881144170  |
| C | 2.681174221478  | -4.245285596503 | 2.325603121891  |
| C | 3.932353661309  | -5.034589122353 | 1.952052790670  |
| C | 1.528415491891  | -4.530315625758 | 1.364016928020  |
| C | 2.278284154183  | -4.490271691704 | 3.779464114355  |
| H | 3.727352468511  | -6.105302710712 | 2.013256164869  |
| H | 4.753615116122  | -4.800729288249 | 2.632127480756  |
| H | 4.246122002715  | -4.802932428144 | 0.931572170870  |
| H | 1.196576467300  | -5.564926915379 | 1.473420270808  |
| H | 1.846400231544  | -4.391037729968 | 0.326907559400  |
| H | 0.677417032476  | -3.880156873260 | 1.577632409498  |
| H | 2.056471083663  | -5.548664708236 | 3.931612908583  |
| H | 1.383691420300  | -3.922745960627 | 4.045439125322  |
| H | 3.092157616255  | -4.213545853662 | 4.454017774774  |
| H | 1.468218655886  | -0.159469543120 | -1.474792645468 |
| O | 3.706814243907  | -0.203594448893 | 1.910812838354  |
| H | 4.321768635357  | -0.949409076947 | 1.951577890437  |
| H | 2.320797234737  | -1.640331205348 | 3.496868803040  |



# Conformer **RI2-II**

38

0.313734

|   |                 |                 |                 |
|---|-----------------|-----------------|-----------------|
| C | 0.000000000000  | 0.000000000000  | 1.541608794768  |
| C | 0.000000000000  | 0.000000000000  | 0.000000000000  |
| N | 1.443664305116  | 0.000000000000  | -0.476236031464 |
| C | 2.097685961194  | -1.328638167023 | -0.162239868097 |
| C | 1.935602859636  | -1.621445539906 | 1.358398442303  |
| C | 1.416881099017  | -0.338063259305 | 2.043114466916  |
| C | 2.217064054462  | 1.135625161310  | 0.175542348989  |
| C | 2.367265473583  | 0.818287279067  | 1.680136035856  |
| N | 0.960762964003  | -2.686128916737 | 1.528601264238  |
| H | -0.731176225985 | -0.723235022471 | 1.897668219280  |
| H | -0.288471141061 | 0.981032133900  | 1.924338440634  |
| H | -0.480609700178 | 0.878862082546  | -0.429582593876 |
| H | -0.458733152204 | -0.898131805721 | -0.411439980111 |
| H | 3.151172801418  | -1.241006171974 | -0.421605787217 |
| H | 1.625366482849  | -2.094271970421 | -0.771981792793 |
| H | 1.423973813660  | -0.498261795541 | 3.121608305333  |
| H | 1.648316877204  | 2.046173691654  | -0.014663979799 |
| H | 3.174587457028  | 1.208632905515  | -0.339841777431 |
| H | 3.394008787941  | 0.540995290960  | 1.914637338468  |
| H | 2.118418869729  | 1.703678488231  | 2.266163705989  |
| O | 1.579736106403  | -3.861571162896 | 0.979527262268  |
| C | 0.606465444677  | -4.848787819867 | 0.484433235069  |
| C | 1.507846537222  | -5.987098531653 | 0.015419813259  |
| C | -0.197939023596 | -4.256647073775 | -0.672366379404 |
| C | -0.300303343477 | -5.290326415843 | 1.633183586232  |
| H | 0.900631236617  | -6.796479249784 | -0.394914888947 |
| H | 2.093800502475  | -6.382432373351 | 0.847224941815  |
| H | 2.193163102429  | -5.642936976222 | -0.762542751678 |
| H | -0.910524588859 | -4.993749096127 | -1.048252819356 |
| H | 0.459174094135  | -3.978665614472 | -1.501404791479 |
| H | -0.762487752553 | -3.382353337067 | -0.341959790296 |
| H | -0.944275199324 | -6.109611870359 | 1.306740880485  |
| H | -0.946488105802 | -4.475269510646 | 1.967451739564  |
| H | 0.296705231057  | -5.643357318257 | 2.477428227945  |
| H | 1.453861149130  | 0.134315478610  | -1.487919722551 |
| O | 3.195118861649  | -1.923189979825 | 1.931617015613  |
| H | 3.411146353176  | -2.840317624066 | 1.711718933977  |
| H | 0.884679683302  | -2.870880121799 | 2.530770017387  |

# Conformer **RI2-III**

38

2.115603

|   |                 |                 |                 |
|---|-----------------|-----------------|-----------------|
| C | -0.000000000000 | -0.000000000000 | 1.543599395965  |
| C | 0.000000000000  | 0.000000000000  | 0.000000000000  |
| N | 1.447081878392  | -0.000000000000 | -0.468790173400 |
| C | 2.213576736539  | -1.115394639984 | 0.202786503715  |
| C | 2.393635560495  | -0.761555425156 | 1.697037207784  |
| C | 1.405737810407  | 0.381799295417  | 2.043078566053  |
| C | 2.098734064207  | 1.344189794631  | -0.163696068921 |
| C | 1.860227372542  | 1.665887117737  | 1.325035025840  |
| N | 2.100693724354  | -1.954082103635 | 2.479518739086  |
| H | -0.273473345155 | -0.982265896224 | 1.924411713299  |
| H | -0.738058304948 | 0.715998570017  | 1.907019528280  |
| H | -0.462455111332 | 0.889199870231  | -0.428867474764 |
| H | -0.477838313405 | -0.881749410706 | -0.426989971232 |
| H | 3.185273703741  | -1.201996550853 | -0.280978338831 |
| H | 1.639942980548  | -2.032815812712 | 0.069433594817  |
| H | 1.403948960440  | 0.521010842132  | 3.122412341796  |
| H | 1.656072088855  | 2.073579485535  | -0.841776610042 |
| H | 3.157491188507  | 1.231457809506  | -0.394072785758 |
| H | 2.781873002978  | 2.050203211763  | 1.756328211772  |
| H | 1.092112960738  | 2.434003789681  | 1.434144382611  |
| O | 2.526417734015  | -1.641495161181 | 3.812688645761  |
| C | 1.736748331216  | -2.319146120494 | 4.854513981493  |
| C | 2.393108842567  | -1.809047834212 | 6.134485715678  |
| C | 1.898127094892  | -3.831665617782 | 4.706180862799  |
| C | 0.271790138250  | -1.896003218318 | 4.768733751690  |
| H | 1.902791720576  | -2.251298901904 | 7.003987405762  |
| H | 2.307389997377  | -0.722455581055 | 6.207072429708  |
| H | 3.450505287423  | -2.079414086081 | 6.159892408070  |
| H | 1.398621472259  | -4.344197211011 | 5.531159586437  |
| H | 2.955064141244  | -4.108079194525 | 4.723125464557  |
| H | 1.449597114265  | -4.187798644368 | 3.775699850083  |
| H | -0.288479807044 | -2.334045057644 | 5.597533315670  |
| H | -0.180405464880 | -2.241706776619 | 3.838283086383  |
| H | 0.177217920597  | -0.809259825126 | 4.835007453941  |
| H | 1.469395336305  | -0.152766565026 | -1.477586710523 |
| O | 3.743748584273  | -0.333083086067 | 1.830992624194  |
| H | 3.955326688681  | -0.339751541474 | 2.775814116104  |
| H | 2.739825481391  | -2.691342404467 | 2.173633736301  |

# Conformer **RI2-IV**

38

9.148380

|   |                 |                 |                 |
|---|-----------------|-----------------|-----------------|
| C | 0.000000000000  | 0.000000000000  | 1.542180316273  |
| C | 0.000000000000  | 0.000000000000  | 0.000000000000  |
| N | 1.444265870566  | 0.000000000000  | -0.480454332607 |
| C | 2.125598301849  | -1.298964199781 | -0.109058496979 |
| C | 2.069531727191  | -1.486255051358 | 1.433220133124  |
| C | 1.438673648583  | -0.212621051275 | 2.048144833789  |
| C | 2.199321772571  | 1.184577815390  | 0.101146865593  |
| C | 2.289617901220  | 1.004921691828  | 1.634025349964  |
| N | 1.419846353255  | -2.764450642403 | 1.744787845553  |
| H | -0.664708081684 | -0.783670225710 | 1.897080818063  |
| H | -0.367815648633 | 0.954830315636  | 1.922478415032  |
| H | -0.475467772395 | 0.880030795097  | -0.433188162737 |
| H | -0.458585922533 | -0.901556036404 | -0.401501231845 |
| H | 3.162464849356  | -1.228960826139 | -0.435017324409 |
| H | 1.614190958008  | -2.101305140482 | -0.633230770270 |
| H | 1.455082074937  | -0.323912540618 | 3.133152242525  |
| H | 1.647597662759  | 2.077402103839  | -0.193625026422 |
| H | 3.176936673973  | 1.204391169915  | -0.380495646354 |
| H | 3.324454063375  | 0.861076026983  | 1.938950207584  |
| H | 1.915417007152  | 1.900585522317  | 2.131801471915  |
| O | 0.142248556507  | -2.853350291186 | 1.110174965203  |
| C | -0.190456117023 | -4.234581034233 | 0.703627424227  |
| C | -1.590969886426 | -4.067183257053 | 0.121463378693  |
| C | -0.203511472988 | -5.135766052763 | 1.937430158903  |
| C | 0.800416551656  | -4.731120461056 | -0.347252972497 |
| H | -1.966739711640 | -5.030880225623 | -0.227593795430 |
| H | -1.579562905891 | -3.381360145292 | -0.730037575471 |
| H | -2.280379384614 | -3.680920045364 | 0.874815703913  |
| H | -0.565724411494 | -6.130501012017 | 1.669452364372  |
| H | -0.867389285131 | -4.727466098352 | 2.703463448436  |
| H | 0.798834254876  | -5.249694042827 | 2.355352110470  |
| H | 0.557851741656  | -5.757067602835 | -0.631848846584 |
| H | 1.819074664041  | -4.721563691373 | 0.043707792646  |
| H | 0.753604254008  | -4.119884177085 | -1.253609201467 |
| H | 1.445856378238  | 0.081673580800  | -1.497849042051 |
| O | 3.364748445487  | -1.583190490194 | 1.986554393845  |
| H | 3.681123918841  | -2.487398927300 | 1.854349658132  |
| H | 1.241104944383  | -2.787184352353 | 2.749266645377  |

# Conformer **RI3-I**

37

0.000000

|   |                 |                 |                 |
|---|-----------------|-----------------|-----------------|
| H | 0.000000000000  | 0.000000000000  | 4.537608134372  |
| C | 0.000000000000  | 0.000000000000  | 0.000000000000  |
| C | 0.328295218506  | 0.000000000000  | -1.344336403198 |
| C | 1.166185688417  | -0.998137335565 | -1.860778965389 |
| C | 1.680901080754  | -1.995848761667 | -1.033563268146 |
| C | 1.358260606066  | -1.998709809931 | 0.318181653743  |
| C | -3.644591803599 | -0.726408538075 | 3.634876155396  |
| C | -3.897230890896 | -0.205919960381 | 5.063528559695  |
| N | -3.369141412453 | -1.242355961493 | 6.047729335022  |
| C | -1.858969978935 | -1.292654541565 | 6.007382328497  |
| C | -1.398346685521 | -1.482585091291 | 4.539552309497  |
| C | -2.640924605219 | -1.891798784801 | 3.701977364359  |
| C | -3.938032782857 | -2.615580896724 | 5.721839156799  |
| C | -3.298479997416 | -3.094588095794 | 4.401152087570  |
| N | -0.908040449492 | -0.165276507677 | 4.098972628660  |
| H | -3.258444543670 | 0.085091178408  | 3.020481289977  |
| H | -4.575997600721 | -1.075697279323 | 3.184138348270  |
| H | -4.953445097989 | -0.061771472239 | 5.290555699552  |
| H | -3.352899458540 | 0.715639081554  | 5.264951875209  |
| H | -1.532079806058 | -2.145944602880 | 6.599418853052  |
| H | -1.478546459966 | -0.370148112245 | 6.446120696210  |
| H | -2.311924061125 | -2.177554494679 | 2.704530240541  |
| H | -5.019237984699 | -2.492569019919 | 5.654240175410  |
| H | -3.712193646093 | -3.266971693093 | 6.566025122415  |
| H | -2.547137683856 | -3.860617775900 | 4.591933148227  |
| H | -4.067508412110 | -3.530416967559 | 3.762556373414  |
| O | -0.599011724842 | -0.173096794650 | 2.665621691659  |
| C | 0.246634275300  | -1.108339206503 | 2.271171239812  |
| C | 0.511725202945  | -1.006582436067 | 0.852850812878  |
| H | -0.640148275966 | 0.772757124529  | 0.407211990228  |
| H | -0.057229933778 | 0.771725481363  | -2.000023654599 |
| H | 1.419800997823  | -0.990122440619 | -2.914885941464 |
| H | 2.331746182286  | -2.759474610837 | -1.441608866276 |
| H | 1.752662608614  | -2.758298794246 | 0.982843669254  |
| H | -3.661474664594 | -0.978784849936 | 6.989189025283  |
| O | -0.412451498251 | -2.480188917537 | 4.558730579214  |
| H | 0.118810721761  | -2.327922610056 | 3.727711935112  |

# Conformer **RI3-II**

37

0.443985

|   |                 |                 |                 |
|---|-----------------|-----------------|-----------------|
| H | -0.000000000000 | -0.000000000000 | 4.537928360559  |
| C | 0.000000000000  | 0.000000000000  | 0.000000000000  |
| C | 0.331530295767  | 0.000000000000  | -1.343639813670 |
| C | 1.154576518714  | 1.009296931098  | -1.862185020701 |
| C | 1.651955820103  | 2.018144626104  | -1.037659626522 |
| C | 1.326596896346  | 2.020946495503  | 0.313377006288  |
| C | -3.188739542395 | 0.394528990088  | 6.027443947087  |
| C | -4.351427858602 | 1.167863863353  | 5.369687848217  |
| N | -3.754906830108 | 2.320795114000  | 4.579442408443  |
| C | -2.662511090132 | 1.807773161111  | 3.667826033483  |
| C | -1.426402738972 | 1.444174964816  | 4.550424113127  |
| C | -1.929082409193 | 1.279515165419  | 6.006912364148  |
| C | -3.205086282456 | 3.378908661894  | 5.530049426960  |
| C | -2.284235088290 | 2.678289957372  | 6.547844106744  |
| N | -0.911383145038 | 0.150886680860  | 4.103138610568  |
| H | -2.998527774480 | -0.537592575131 | 5.496308310999  |
| H | -3.455544988059 | 0.145153577214  | 7.055032648070  |
| H | -5.035045123315 | 1.610062393202  | 6.094758362425  |
| H | -4.927182296582 | 0.559125315192  | 4.672724017329  |
| H | -2.407239164195 | 2.600489081243  | 2.967541599525  |
| H | -3.057896035198 | 0.946835120138  | 3.131041224373  |
| H | -1.134149242023 | 0.835480484110  | 6.607004289667  |
| H | -4.062335234755 | 3.871570609200  | 5.988582479859  |
| H | -2.659280058560 | 4.092118702308  | 4.913958601367  |
| H | -1.387660557028 | 3.276815028538  | 6.689659899100  |
| H | -2.782581640643 | 2.574615176513  | 7.513694773122  |
| O | -0.611856570635 | 0.176420343790  | 2.662163135451  |
| C | 0.226504985613  | 1.117677679360  | 2.268210661589  |
| C | 0.493597338472  | 1.018227533920  | 0.849822521357  |
| H | -0.626978159538 | -0.782275394500 | 0.409631560676  |
| H | -0.038949209132 | -0.781257192735 | -1.996704827214 |
| H | 1.411625698854  | 1.000546274931  | -2.915432918116 |
| H | 2.293047124463  | 2.789278294387  | -1.447042538589 |
| H | 1.710427755551  | 2.787375635160  | 0.976478325234  |
| H | -4.485246736085 | 2.744151527469  | 4.006399982026  |
| O | -0.477255980224 | 2.482184047154  | 4.532665625380  |
| H | 0.071437384473  | 2.319101279175  | 3.714219642392  |

Conformer **RI3-IV**

37

1.675567

|   |                 |                 |                 |
|---|-----------------|-----------------|-----------------|
| H | 0.000000000000  | 0.000000000000  | 4.528306869414  |
| C | 0.000000000000  | 0.000000000000  | 0.000000000000  |
| C | 0.337844153495  | 0.000000000000  | -1.341954576732 |
| C | 1.249624538796  | 0.943986728751  | -1.834670401313 |
| C | 1.830177639193  | 1.885805384752  | -0.985754858998 |
| C | 1.500544538945  | 1.886335067532  | 0.364266908925  |
| C | -2.731904655831 | 0.124671405931  | 6.279201674554  |
| C | -3.903727069508 | 0.219442544678  | 5.283357268324  |
| N | -3.907672708765 | 1.618421697636  | 4.686595378924  |
| C | -2.717519693207 | 1.800129916171  | 3.770333508907  |
| C | -1.410980263363 | 1.464762361394  | 4.557202143217  |
| C | -1.786486691534 | 1.319598730052  | 6.054919863878  |
| C | -3.885205087152 | 2.666088032228  | 5.789462957286  |
| C | -2.503738531125 | 2.614921887601  | 6.478478795847  |
| N | -0.913550034921 | 0.162528351141  | 4.101409770505  |
| H | -2.218154626920 | -0.823453800769 | 6.134023227711  |
| H | -3.100008278226 | 0.150466915288  | 7.306959852118  |
| H | -4.877447864793 | 0.065321550668  | 5.748217489672  |
| H | -3.789212805120 | -0.471333626707 | 4.448698562887  |
| H | -2.696324590782 | 2.843020508748  | 3.460436038017  |
| H | -2.858795037395 | 1.156541349330  | 2.903839910470  |
| H | -0.863217349372 | 1.204941594651  | 6.623206331402  |
| H | -4.707971223740 | 2.422789903298  | 6.462232269724  |
| H | -4.089985955825 | 3.628782088569  | 5.321316484720  |
| H | -1.900292134954 | 3.477822080252  | 6.199894311240  |
| H | -2.635339789082 | 2.633130820518  | 7.560889560524  |
| O | -0.624949485697 | 0.187532144349  | 2.662644825529  |
| C | 0.313603074365  | 1.043529735839  | 2.292954069501  |
| C | 0.577809832303  | 0.950717930583  | 0.874556311572  |
| H | -0.695009900374 | -0.733547208060 | 0.389594355173  |
| H | -0.096117068308 | -0.730985823553 | -2.013861590126 |
| H | 1.510505132928  | 0.936022912594  | -2.886996689847 |
| H | 2.538760092722  | 2.606431532322  | -1.375385070692 |
| H | 1.947277807082  | 2.600279645616  | 1.046166143508  |
| H | -4.760175289052 | 1.738135555298  | 4.138420564952  |
| O | -0.488769174295 | 2.514222135222  | 4.430792375980  |
| H | 0.109394690651  | 2.272787229586  | 3.666522086932  |

# Conformer **RI4-I**

36

0.000000

|   |                 |                 |                 |
|---|-----------------|-----------------|-----------------|
| C | 0.000000000000  | -0.000000000000 | 1.544256216812  |
| C | 0.000000000000  | 0.000000000000  | 0.000000000000  |
| N | 1.445712502729  | 0.000000000000  | -0.468563262831 |
| C | 2.203685243091  | -1.123698333792 | 0.201599815387  |
| C | 2.393595902202  | -0.754081566781 | 1.704054260346  |
| C | 1.405647045110  | 0.382951667467  | 2.045245199974  |
| C | 2.098205268035  | 1.342733587811  | -0.163581102154 |
| C | 1.863272855790  | 1.666636442282  | 1.325373177882  |
| N | 2.079259326578  | -1.925458284290 | 2.499952282434  |
| H | -0.279799471602 | -0.981622412037 | 1.924818068405  |
| H | -0.733530334643 | 0.720368267024  | 1.907674771095  |
| H | -0.464690453919 | 0.888911341366  | -0.426999439933 |
| H | -0.477605743937 | -0.882888439870 | -0.424214702381 |
| H | 3.164913669068  | -1.225743237396 | -0.298175336800 |
| H | 1.623906534380  | -2.036458176770 | 0.072895287882  |
| H | 1.400956848469  | 0.539029483850  | 3.124707530701  |
| H | 1.655720913360  | 2.074231243399  | -0.839428376998 |
| H | 3.156618016774  | 1.230400930155  | -0.395301232401 |
| H | 2.784123569029  | 2.048597025520  | 1.759904906101  |
| H | 1.093783091496  | 2.432905354848  | 1.436328328116  |
| O | 3.024980635460  | -2.935960016794 | 2.121334984918  |
| C | 2.441273728795  | -4.110821619074 | 1.635419259523  |
| C | 1.082021486547  | -4.393428754491 | 1.716737767863  |
| C | 0.618915554608  | -5.604966164382 | 1.196072884777  |
| C | 1.497345420228  | -6.511901303264 | 0.610636044137  |
| C | 2.858645466532  | -6.208783970844 | 0.547626422231  |
| C | 3.338572943827  | -5.006212706087 | 1.057178373109  |
| H | 0.407829702572  | -3.696888362738 | 2.193729725238  |
| H | -0.437145029818 | -5.839178744865 | 1.264578081123  |
| H | 1.129342635492  | -7.450411232696 | 0.214898918093  |
| H | 3.552822270610  | -6.911547953008 | 0.102218659953  |
| H | 4.393199526963  | -4.760315167166 | 1.023498568815  |
| H | 1.466016878392  | -0.152493258255 | -1.477514912087 |
| O | 3.701744192924  | -0.251670887093 | 1.927325418631  |
| H | 4.321052759757  | -0.994278507015 | 1.923078661382  |
| H | 2.300688391201  | -1.734783734288 | 3.476780543407  |

# Conformer **RI4-II**

36

0.971952

|   |                 |                 |                 |
|---|-----------------|-----------------|-----------------|
| C | -0.000000000000 | -0.000000000000 | 1.541314165507  |
| C | 0.000000000000  | 0.000000000000  | 0.000000000000  |
| N | 1.446086441826  | 0.000000000000  | -0.471956682442 |
| C | 2.089735823444  | -1.336982981929 | -0.177729714413 |
| C | 1.897020966215  | -1.663792853785 | 1.334863585414  |
| C | 1.407183903425  | -0.380901974981 | 2.042782142278  |
| C | 2.224718304357  | 1.117780773058  | 0.203969988618  |
| C | 2.385051569877  | 0.758525565972  | 1.697965875640  |
| N | 0.874189673359  | -2.692474657143 | 1.463139956970  |
| H | -0.754875065008 | -0.698491914734 | 1.897244172954  |
| H | -0.257250672546 | 0.989157285105  | 1.925415213872  |
| H | -0.478958052602 | 0.879742982896  | -0.429383437164 |
| H | -0.456491478451 | -0.899177653682 | -0.412816481189 |
| H | 3.149705707453  | -1.244845856849 | -0.407902363870 |
| H | 1.632169423604  | -2.079913727115 | -0.828031796181 |
| H | 1.407945726863  | -0.559925385541 | 3.118325736724  |
| H | 1.654054514235  | 2.032773159597  | 0.043597225728  |
| H | 3.178685138410  | 1.206083650034  | -0.315599253051 |
| H | 3.406857853656  | 0.449047599642  | 1.913850602380  |
| H | 2.166846589693  | 1.635289516789  | 2.308514228021  |
| O | 1.395016247902  | -3.876614060123 | 0.844194599896  |
| C | 0.602835422663  | -4.357180566744 | -0.202454305048 |
| C | -0.722557799366 | -3.983658306202 | -0.403063155559 |
| C | -1.419988444890 | -4.540215966160 | -1.478289436964 |
| C | -0.804845692263 | -5.453257405483 | -2.330390307820 |
| C | 0.522729830424  | -5.820066363226 | -2.103943337421 |
| C | 1.235444118034  | -5.272205274941 | -1.041270321835 |
| H | -1.203650794185 | -3.296528784463 | 0.278212162588  |
| H | -2.456456700959 | -4.264649897177 | -1.635407279552 |
| H | -1.355241417089 | -5.883509676565 | -3.157897385165 |
| H | 1.008260637084  | -6.536560678295 | -2.755848318955 |
| H | 2.264364824252  | -5.551516827179 | -0.848556683182 |
| H | 1.460488593780  | 0.150031803459  | -1.481513030022 |
| O | 3.132532537972  | -2.023435371878 | 1.918972385785  |
| H | 3.357827067681  | -2.921911807655 | 1.641531471858  |
| H | 0.787548791492  | -2.950185471911 | 2.446055654142  |



# Conformer **RI4-III**

36

0.584433

|   |                 |                 |                 |
|---|-----------------|-----------------|-----------------|
| C | -0.000000000000 | 0.000000000000  | 1.539769332093  |
| C | 0.000000000000  | 0.000000000000  | 0.000000000000  |
| N | 1.448523302990  | -0.000000000000 | -0.475342798833 |
| C | 2.100313307910  | -1.329681039831 | -0.180205853951 |
| C | 1.914005791994  | -1.653112621794 | 1.321188703523  |
| C | 1.409440806162  | -0.373894155116 | 2.036498515459  |
| C | 2.224627587065  | 1.123519317249  | 0.198328116030  |
| C | 2.379843918054  | 0.771325715814  | 1.694375701600  |
| N | 0.918892546532  | -2.718474657587 | 1.417268486991  |
| H | -0.746844410135 | -0.703691252694 | 1.901442158527  |
| H | -0.262315356394 | 0.988475846041  | 1.922431483014  |
| H | -0.476943318918 | 0.878936197183  | -0.433306334750 |
| H | -0.458632461644 | -0.898712244464 | -0.411183174902 |
| H | 3.160897939773  | -1.246739260861 | -0.412512563900 |
| H | 1.640081102041  | -2.078168766681 | -0.825712127396 |
| H | 1.397764540058  | -0.558688672421 | 3.109944518484  |
| H | 1.651030369222  | 2.035194757267  | 0.030365139605  |
| H | 3.179247502308  | 1.210575214757  | -0.320355374734 |
| H | 3.404032711565  | 0.470053606409  | 1.911555261947  |
| H | 2.154120626052  | 1.649787074993  | 2.299547383349  |
| O | 0.835728210873  | -3.072080384028 | 2.804502187466  |
| C | -0.454439029185 | -2.980854604650 | 3.332821282946  |
| C | -1.601925596447 | -3.196023940440 | 2.575952281254  |
| C | -2.844320748575 | -3.121287022663 | 3.206768585536  |
| C | -2.933961884751 | -2.847636663224 | 4.570372317715  |
| C | -1.769988187616 | -2.647331999862 | 5.312112271811  |
| C | -0.522129931604 | -2.707141470454 | 4.695335550874  |
| H | -1.525145264361 | -3.420803409953 | 1.520861481836  |
| H | -3.744177653988 | -3.292147564845 | 2.627368140788  |
| H | -3.902258066209 | -2.797742634896 | 5.052951606854  |
| H | -1.829584166880 | -2.440311352568 | 6.374032338576  |
| H | 0.392076829985  | -2.557286291337 | 5.257245699707  |
| H | 1.462748057301  | 0.150419671947  | -1.484679689313 |
| O | 3.193714127685  | -2.042444738458 | 1.784821839968  |
| H | 3.092721942472  | -2.424274020119 | 2.667712978991  |
| H | 1.303605777837  | -3.557798771647 | 0.981537739722  |

# Conformer **RI4-IV**

36

0.808412

|   |                 |                 |                 |
|---|-----------------|-----------------|-----------------|
| C | -0.000000000000 | 0.000000000000  | 1.544778218616  |
| C | 0.000000000000  | 0.000000000000  | 0.000000000000  |
| N | 1.444299683339  | -0.000000000000 | -0.480992215218 |
| C | 2.200505681932  | -1.163301902547 | 0.113166743638  |
| C | 2.338210437824  | -0.944635947679 | 1.638819086863  |
| C | 1.433780670092  | 0.246527728077  | 2.047152548818  |
| C | 2.128379514628  | 1.311561266505  | -0.118230633088 |
| C | 1.982412930922  | 1.532029913650  | 1.402023739535  |
| N | 1.892204370956  | -2.170593542811 | 2.295672360526  |
| H | -0.372318702811 | -0.947772485829 | 1.929249384666  |
| H | -0.659242315894 | 0.787376827731  | 1.911899395228  |
| H | -0.465644825250 | 0.887384593110  | -0.429121824127 |
| H | -0.476016044073 | -0.883254486502 | -0.426015581861 |
| H | 3.185521674244  | -1.202171370374 | -0.349513457778 |
| H | 1.639522441174  | -2.069274306606 | -0.117276012660 |
| H | 1.438154547491  | 0.336675893466  | 3.132692307146  |
| H | 1.655060235745  | 2.090639233063  | -0.715520104866 |
| H | 3.169109211250  | 1.210376863731  | -0.425040545364 |
| H | 2.951895555649  | 1.793080676087  | 1.820863786274  |
| H | 1.296576641856  | 2.356507484044  | 1.603612203088  |
| O | 2.171842383691  | -2.012824148442 | 3.692075079955  |
| C | 1.027796084420  | -2.029308172784 | 4.496919817562  |
| C | -0.136455353672 | -2.708870103745 | 4.154982081036  |
| C | -1.207454969352 | -2.693336313724 | 5.049498186419  |
| C | -1.110156499862 | -2.018871092767 | 6.264981235158  |
| C | 0.071158528276  | -1.353272882017 | 6.591764756606  |
| C | 1.146336287233  | -1.350233591523 | 5.705979480277  |
| H | -0.199087865419 | -3.244451519553 | 3.217879248963  |
| H | -2.117109183423 | -3.225122101392 | 4.795617459721  |
| H | -1.944728689343 | -2.017397776049 | 6.955260673150  |
| H | 0.159192756107  | -0.831895001845 | 7.537567806979  |
| H | 2.073074829322  | -0.842852275603 | 5.946543624684  |
| H | 1.450564641160  | -0.098919294160 | -1.496998767671 |
| O | 3.709077955679  | -0.657859663660 | 1.866511750014  |
| H | 3.869042965773  | -0.698475355113 | 2.819884324292  |
| H | 2.509526369675  | -2.935348951597 | 2.021487669439  |
